# Supplementary material for: Redox-switchable bistable nickel corrole
Source: Royal Society of Chemistry journal article supplement (doi:10.1039/d3qi00294b), 2023-01-01
Supplement: d3qi00294b2.pdf [file d3qi00294b2.pdf]

## Supporting Information

### Redox-switchable bistable nickel corrole

Hu Gao, Fan Wu\*, Yue Zhao, Xianli Yang and Zhen Shen\*

State Key Laboratory of Coordination Chemistry,  
Collaborative Innovation Center of Advanced Microstructures,  
School of Chemistry and Chemical Engineering,  
Nanjing University, Nanjing 210023, China

Email: [wufan@nju.edu.cn](mailto:wufan@nju.edu.cn) and [zshen@nju.edu.cn](mailto:zshen@nju.edu.cn)

#### Contents

|                                                           |           |
|-----------------------------------------------------------|-----------|
| 1. Materials and methods.....                             | page. S2  |
| 2. Mass spectra .....                                     | page. S2  |
| 3. NMR spectra.....                                       | page. S4  |
| 4. UV/vis spectral changes during chemical reduction..... | page. S6  |
| 5. Spectroelectrochemistry measurements.....              | page. S7  |
| 6. Stability of <b>1</b> and <b>1</b> <sup>+</sup> .....  | page. S7  |
| 7. X-ray diffraction analysis.....                        | page. S8  |
| 8. Theoretical analysis .....                             | page. S9  |
| 9. Cartesian coordinates for optimized geometries.....    | page. S22 |
| 10. References .....                                      | page. S37 |

## 1. Materials and methods

**General:** All reagents and solvents were commercial reagent grade and used without further purification. ESI-HR-MS data were recorded on a Thermo Scientific Q Exactive MS using a positive ion mode. The NMR spectra were measured on a Bruker AVANCE III 400 and HD 500. X-ray diffraction data were collected on a Bruker D8 Venture with GaK $\alpha$  radiation ( $\lambda = 1.34139 \text{ \AA}$ ). MALDI-TOF MS data were measured on a Bruker Daltonics autoflex II spectrometer. The elemental analysis was performed on a Vario Micro Cube elemental analyzer. UV-visible-NIR absorption spectra were measured on a Shimadzu UV-3600 spectrophotometer. Cyclic voltammetry measurements were carried out on a CHI650E electrochemical workstation with a standard three-electrode system. Spectroelectrochemistry spectra were measured on Pine spectroelectrochemical intergraded system with honeycomb cell kits and Avaspec ULS2048 UV/vis spectrometer. ESR spectra were obtained using a Bruker EMX-10/12 spectrometer. The VT ESR data were fitted by a modified Bleaney- Bowers equation<sup>1</sup>:

$$IT = \frac{C}{k_B [3 + \exp(-2J / k_B T)]}$$

Where  $I$  is the intensity of ESR spectra,  $C$  is a constant,  $k_B$  is Boltzman's constant,  $T$  is the temperature, and  $-2J$  is correlated to the excitation energy from the singlet ground state to the triplet excited state.

## 2. Mass spectra

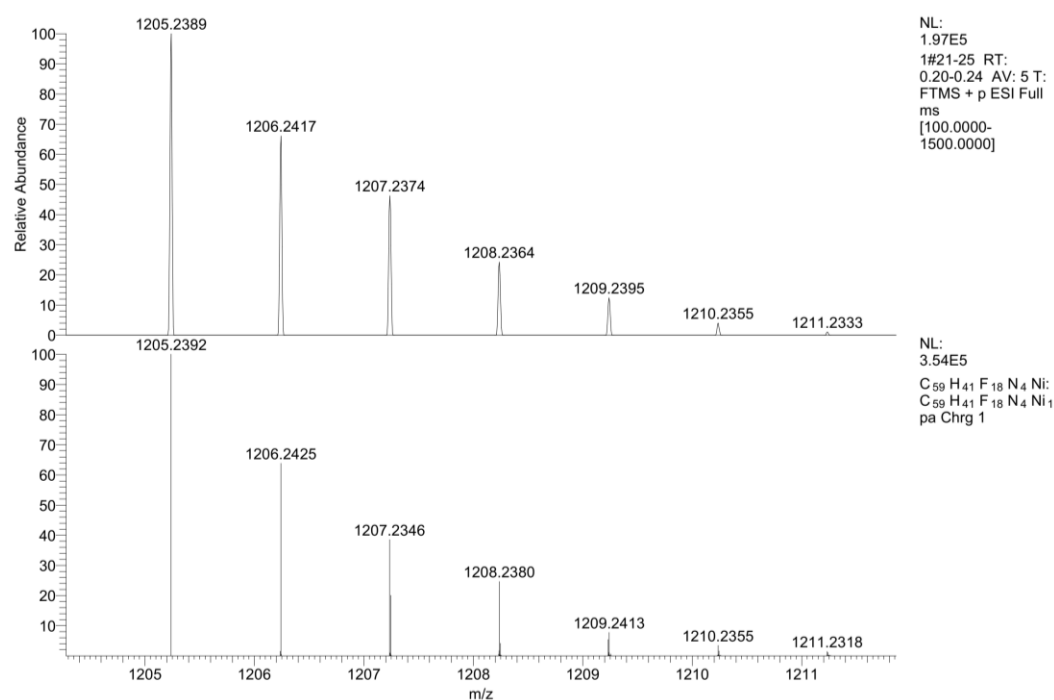

Figure S1. HR-ESI-MS spectrum of 1.

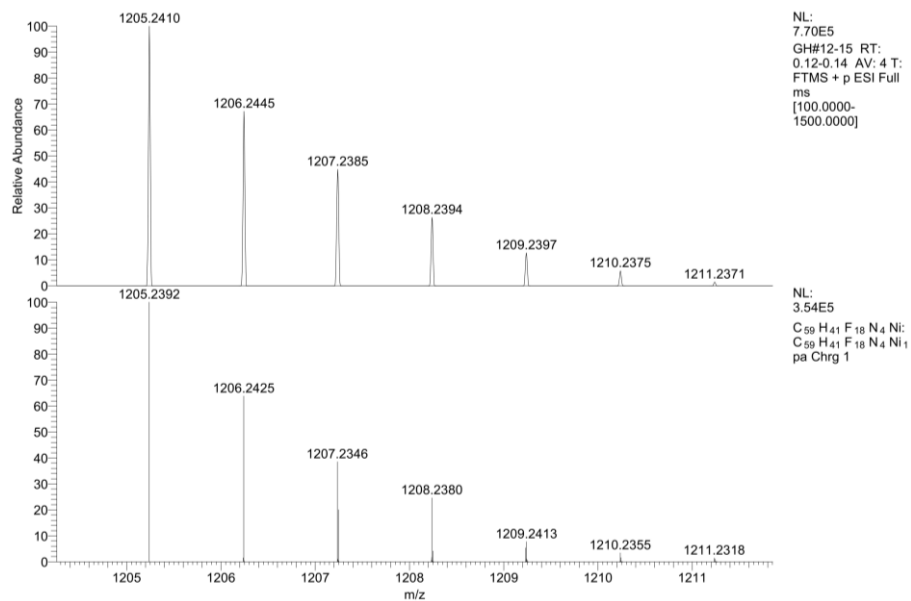

Figure S2. HR-ESI-MS spectrum of **1**<sup>+</sup>.

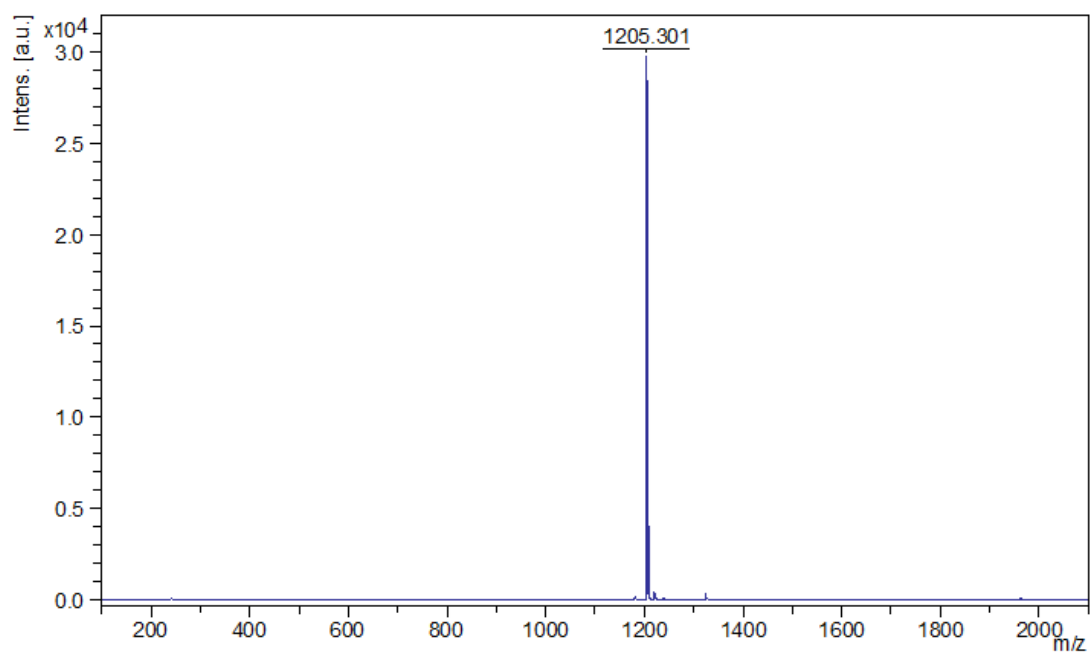

Figure S3. MALDI-TOF mass spectrum of **1**.

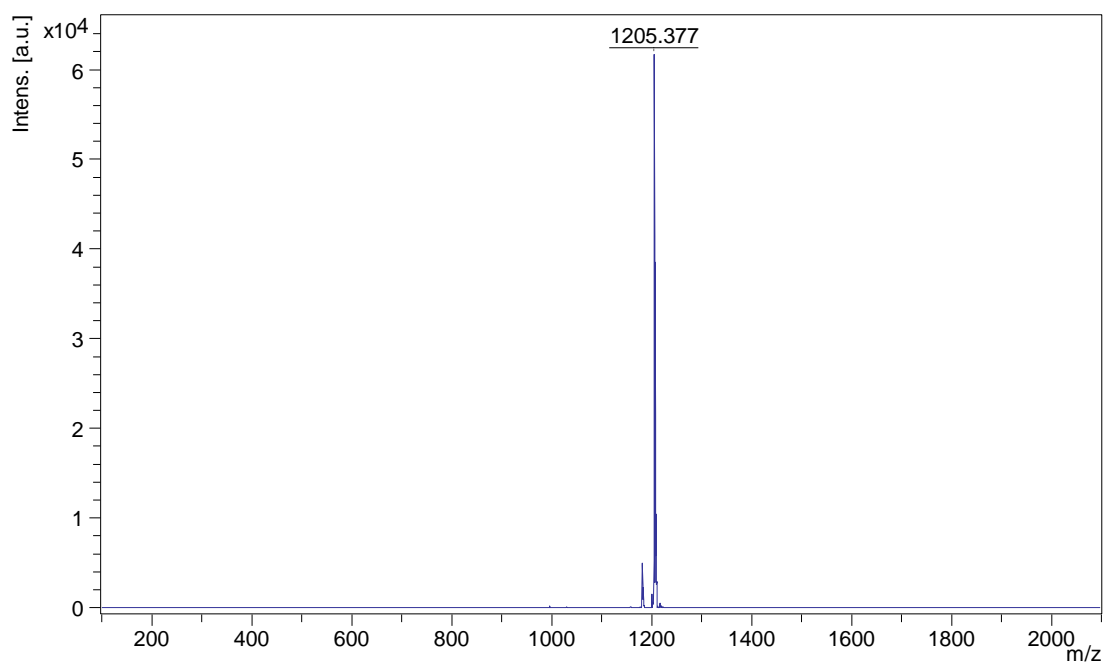

Figure S4. MALDI-TOF mass spectrum of  $1^+$ .

### 3. NMR spectra

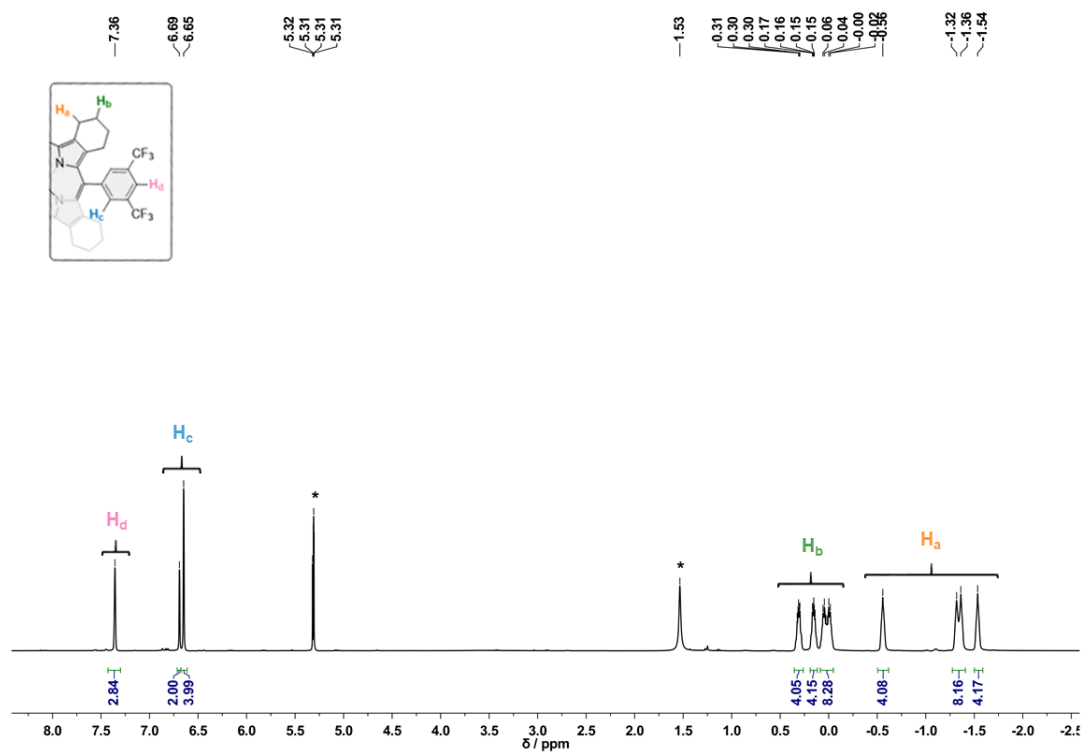

Figure S5.  $^1\text{H}$  NMR spectrum (400 MHz) of  $1^+$  in  $\text{CD}_2\text{Cl}_2$ . Solvent and water peaks are marked with asterisks.

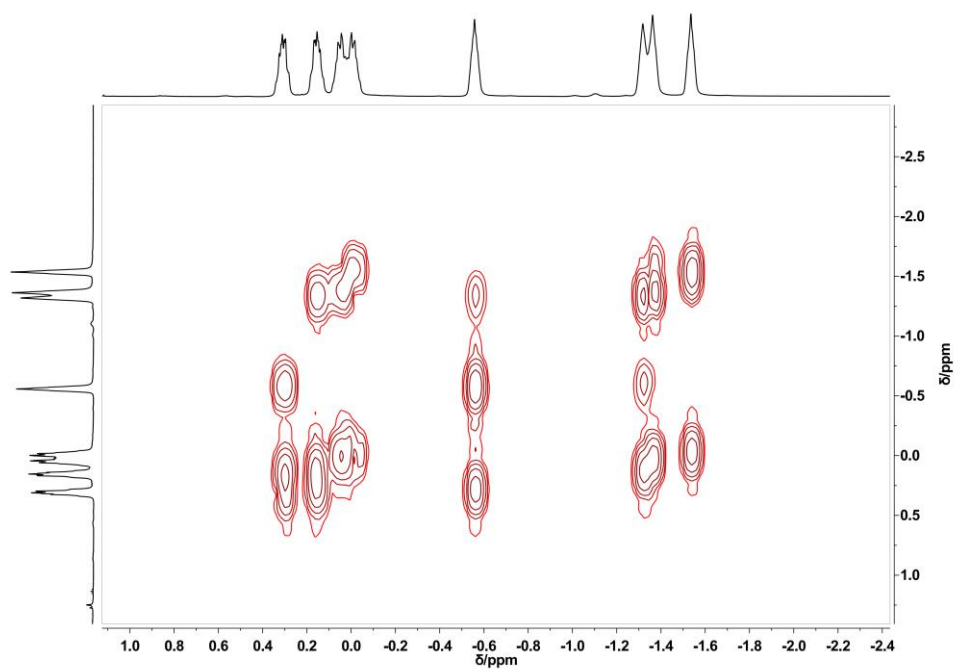

**Figure S6.** H-H COSY spectrum (400 MHz) of  $1^+$  in  $CD_2Cl_2$ .

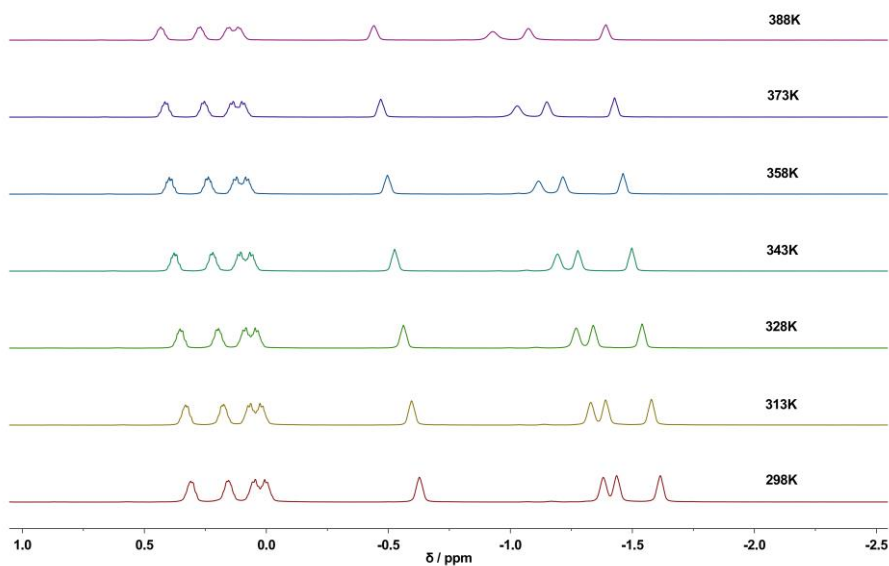

**Figure S7.** VT-NMR spectrum (500 MHz) of  $1^+$  in  $C_2D_2Cl_4$ .

**$^1\text{H}$  NMR measurement of  $1^-$ .** In a glovebox,  $1$  (10 mg, 0.008 mmol) and Kryptofix 222 (6 mg, 0.016 mmol) were dissolved in 1 mL  $\text{THF-}d_8$ .  $\text{KC}_8$  (2.2 mg, 0.016 mmol) was dispersed in  $\text{THF-}d_8$  and added dropwise to the solution of  $1$ . After stirring for 2 hours, the solution was loaded directly into the NMR tube and sealed for measurement.  $^1\text{H}$  NMR (400 MHz,  $\text{THF-}d_8$ ):  $\delta$  8.47 (s, 4H, aryl-*ortho*), 8.44 (s, 2H, aryl-*ortho*), 8.23 (d, 3H, aryl-*para*), 4.06 (m, 4H,  $\beta$ -butano), 2.94-2.96 (m, 48H, kryp), 2.59 (m, 8H,  $\beta$ -butano), 2.39 (m, 4H,  $\beta$ -butano), 2.13 (m, 4H,  $\beta$ -butano), 2.00 (m, 24H, kryp), 1.88 (m, 4H,  $\beta$ -butano), 1.62 (m, 8H,  $\beta$ -butano).

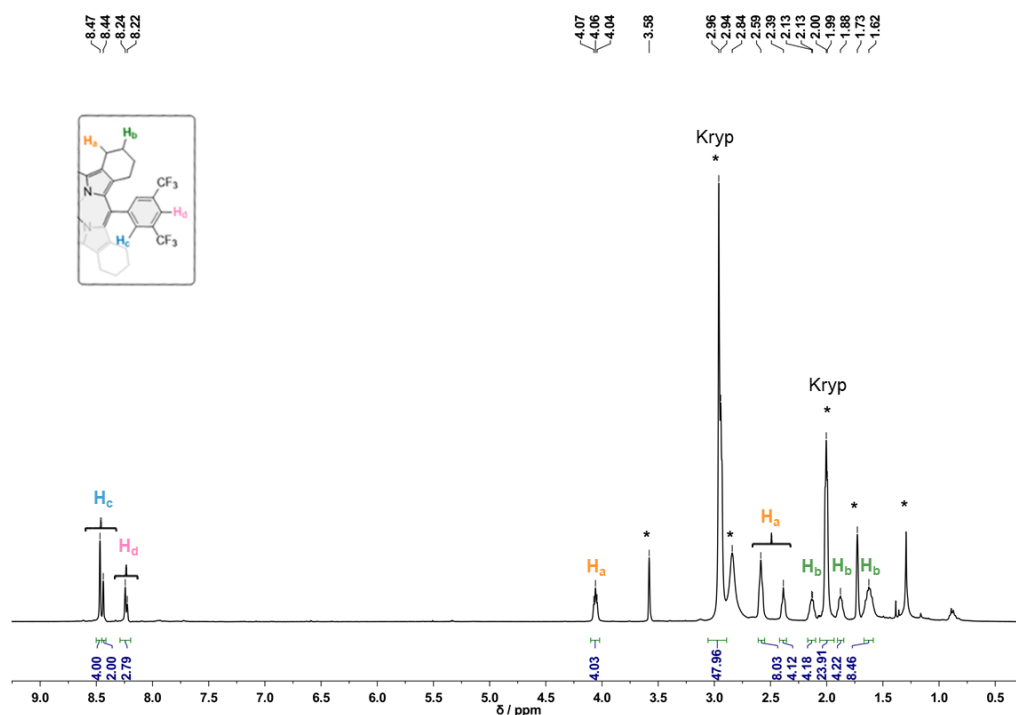

**Figure S8.**  $^1\text{H}$  NMR spectrum (400 MHz) of  $1^-$  in  $\text{THF-}d_8$ . Solvent and Kryptofix-222 resonances are marked with asterisks.

#### 4. UV/vis spectral changes during chemical reduction

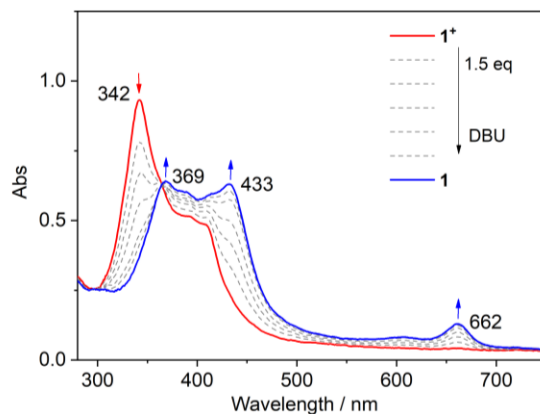

**Figure S9.** UV-vis spectra change from  $1^+$  to  $1$  after adding 1.5 eq DBU into the  $\text{CH}_2\text{Cl}_2$  solution of  $1^+$ .

## 5. Spectroelectrochemistry measurements

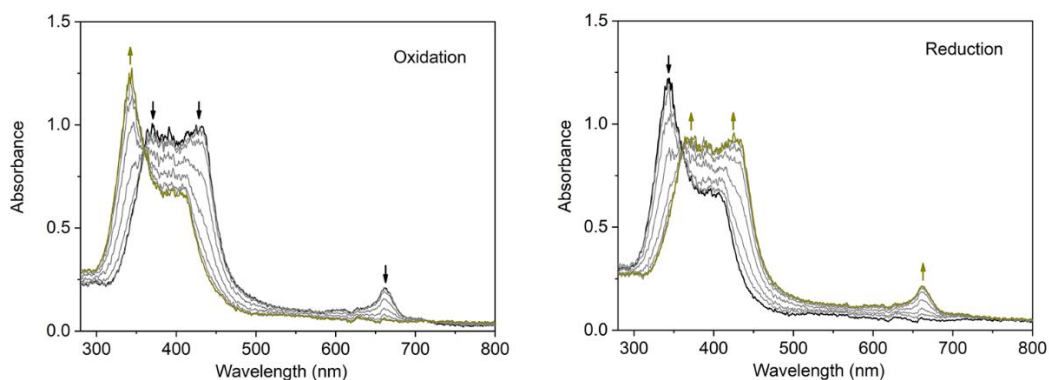

**Figure S10.** UV-vis spectral changes of from **1** to **1<sup>+</sup>** (left) and from **1<sup>+</sup>** to **1** (right) with applying potential positively shifted to 0.3 V (oxidation) and negatively shifted to -0.3 V (reduction) in CH<sub>2</sub>Cl<sub>2</sub>.

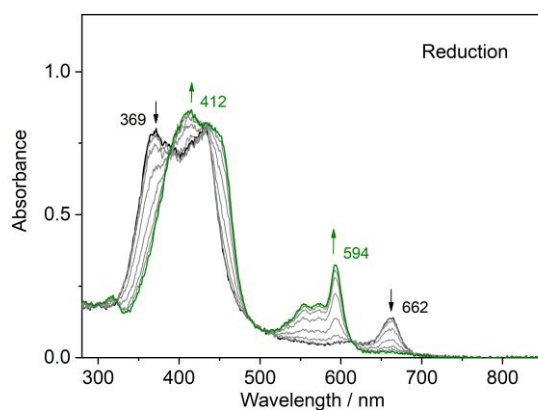

**Figure S11.** UV-vis spectral changes from **1** to **1<sup>-</sup>** during the electrochemical reduction with applying potential negatively shifted to -0.8 V in CH<sub>2</sub>Cl<sub>2</sub>.

## 6. Stability of 1 and 1<sup>+</sup>

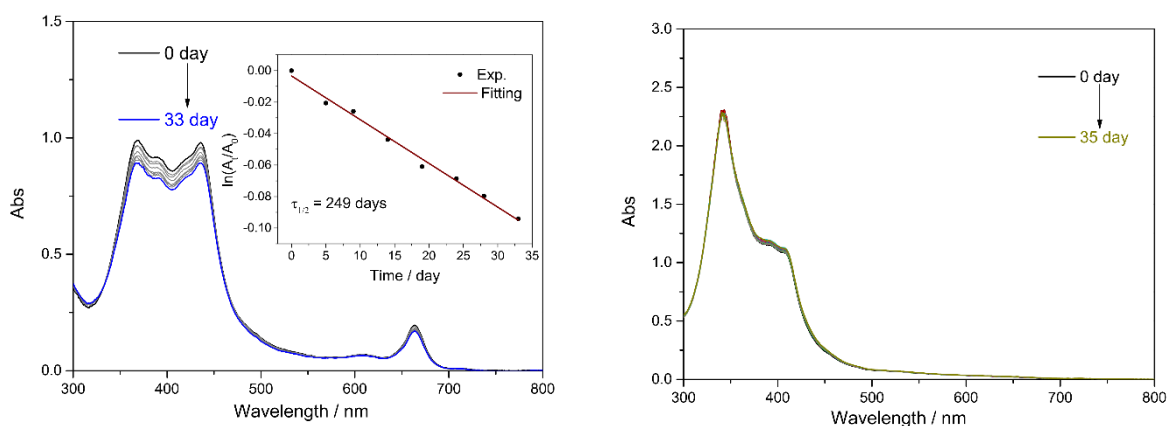

**Figure S12.** Time course of the absorbance change of **1** (left) in toluene ( $1.7 \times 10^{-5}$  mol/L) and **1<sup>+</sup>** (right) in DCM monitored by UV-vis measurements ( $3 \times 10^{-5}$  mol/L).

## 7. X-ray diffraction analysis

**Table S1.** Crystallographic data of **1** and **1<sup>+</sup>**.

| Compound                       | Crystallographic data                                             |                                                                                                                         |
|--------------------------------|-------------------------------------------------------------------|-------------------------------------------------------------------------------------------------------------------------|
|                                | <b>1</b>                                                          | <b>1<sup>+</sup>SbF<sub>6</sub><sup>-</sup></b>                                                                         |
| CCDC.No.                       | 2168702                                                           | 2168703                                                                                                                 |
| Formula                        | C <sub>59</sub> H <sub>41</sub> F <sub>18</sub> N <sub>4</sub> Ni | C <sub>59</sub> H <sub>41</sub> F <sub>18</sub> N <sub>4</sub> NiF <sub>6</sub> Sb, 2(CH <sub>2</sub> Cl <sub>2</sub> ) |
| Formula weight                 | 1206.67                                                           | 1612.27                                                                                                                 |
| Radiation                      | GaK $\alpha$                                                      | GaK $\alpha$                                                                                                            |
| Temperature [K]                | 193                                                               | 173                                                                                                                     |
| Crystal system                 | Monoclinic                                                        | Monoclinic                                                                                                              |
| Space group                    | P 1 21/n 1                                                        | C 2/c                                                                                                                   |
| a [Å]                          | 23.608(2)                                                         | 43.583(5)                                                                                                               |
| b [Å]                          | 8.3957(7)                                                         | 17.614(2)                                                                                                               |
| c [Å]                          | 29.792(3)                                                         | 16.1794(18)                                                                                                             |
| $\alpha$ [deg]                 | 90                                                                | 90                                                                                                                      |
| $\beta$ [deg]                  | 101.871(4)                                                        | 92.066(9)                                                                                                               |
| $\gamma$ [deg]                 | 90                                                                | 90                                                                                                                      |
| V [Å <sup>3</sup> ]            | 5778.6(9)                                                         | 12413(3)                                                                                                                |
| Z                              | 4                                                                 | 8                                                                                                                       |
| $\rho$ [gcm <sup>-3</sup> ]    | 1.387                                                             | 1.725                                                                                                                   |
| $\mu$ [mm <sup>-1</sup> ]      | 2.394                                                             | 5.751                                                                                                                   |
| F (000)                        | 2452                                                              | 6416                                                                                                                    |
| Reflections collected / unique | 12893 / 74723                                                     | 11405 / 64837                                                                                                           |
| R <sub>1</sub>                 | 0.0713                                                            | 0.0490                                                                                                                  |
| wR <sub>2</sub>                | 0.2303                                                            | 0.1533                                                                                                                  |
| GOF                            | 1.091                                                             | 1.074                                                                                                                   |

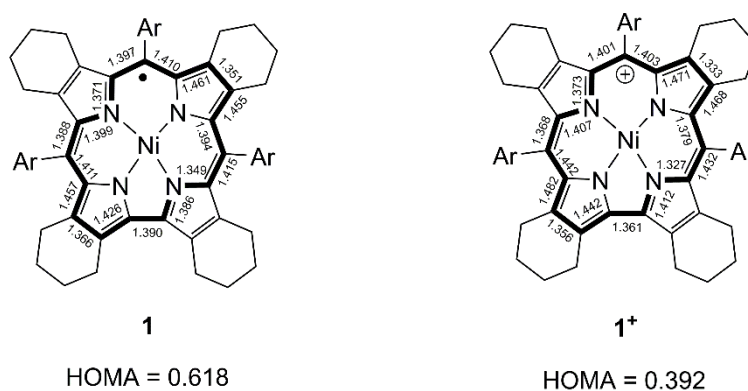

**Figure S13.** Selected distances and calculated HOMA values for single-crystal structures of **1** and **1<sup>+</sup>**.



## 8. Theoretical analysis

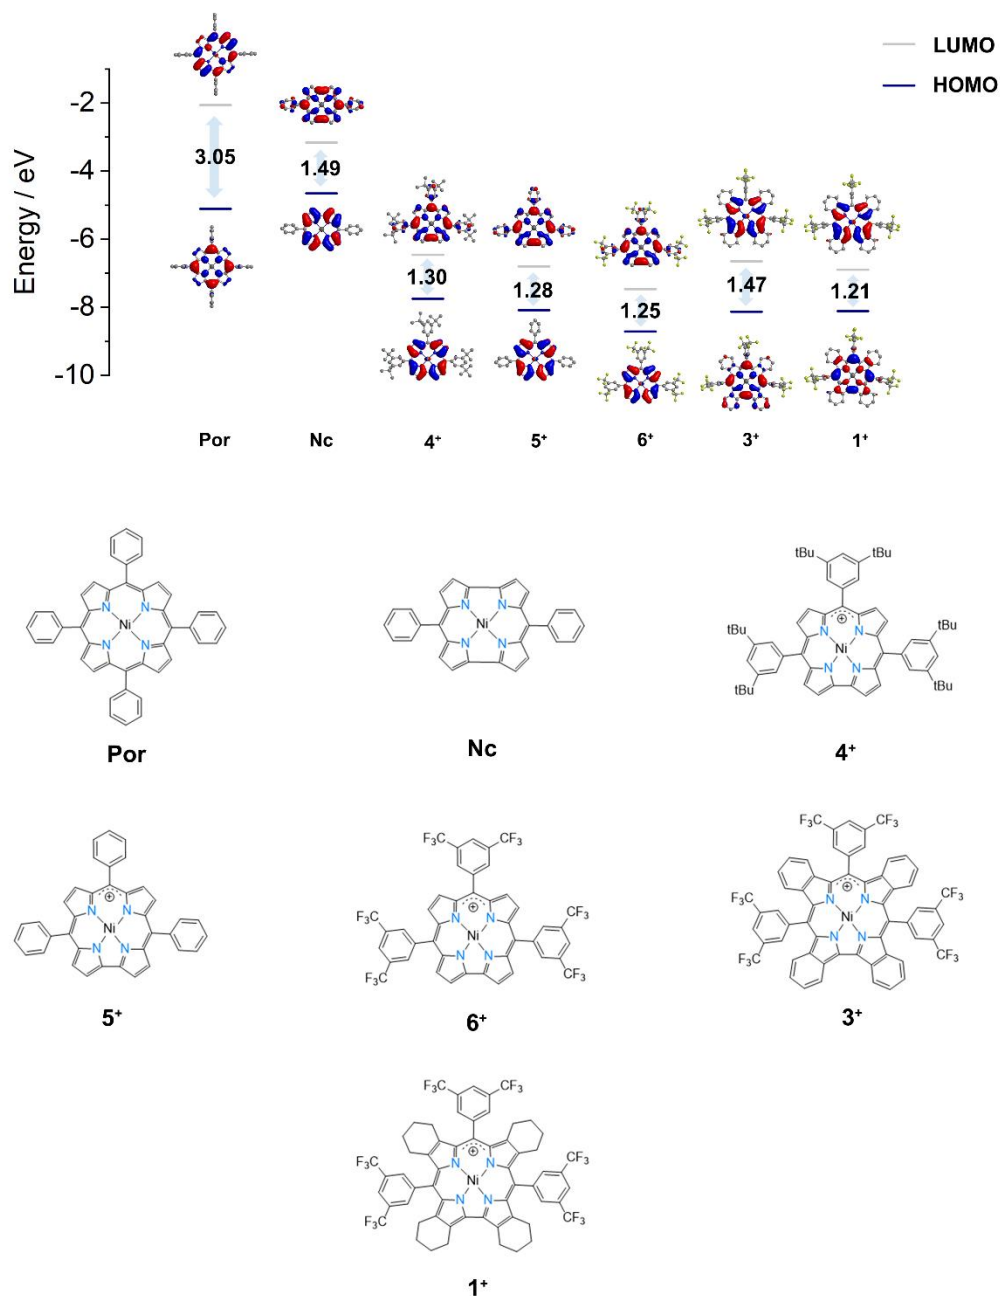

**Figure S14.** The calculated HOMO-LUMO gaps of meso-phenyl substituted nickel porphyrin and norcorrole, and a series of nickel corroles with various meso- and  $\beta$ ,  $\beta'$ -substituents at the (U)B3LYP/6-31G(d,p) (C, N, F, H)+SDD(Ni) level of theory.

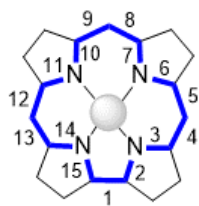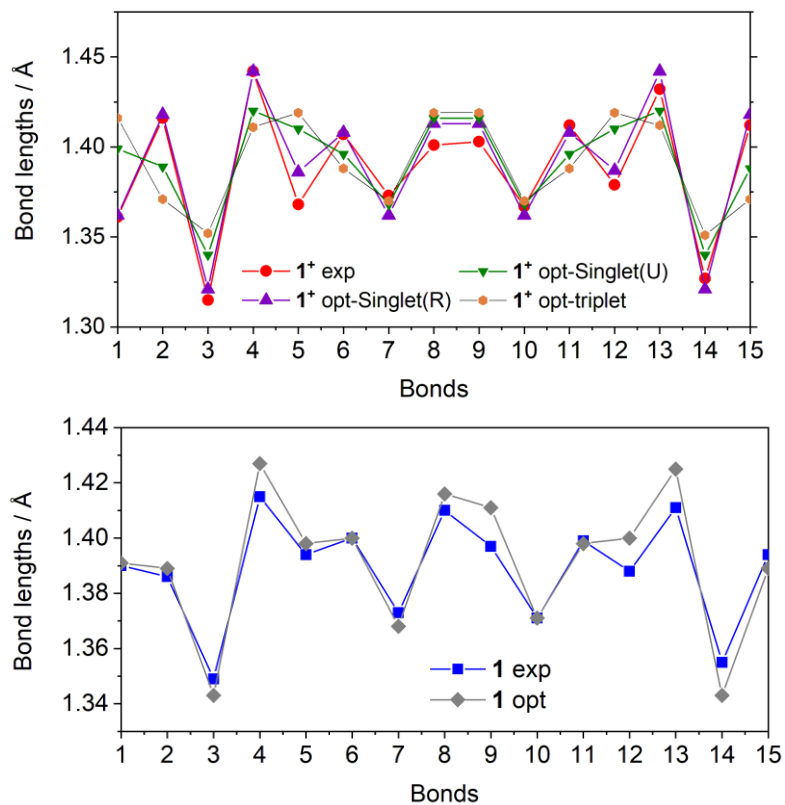

**Figure S15.** Comparison of selected inner 15 bond lengths of 1<sup>+</sup> and 1 between DFT optimized structures and single-crystal X-ray diffraction characterized structures.

The diradical character was evaluated by performing a natural orbital (NO) population analysis. From the occupation numbers  $n$  of the highest occupied NO (HONO) and lowest unoccupied NO (LUNO) the diradical character ( $y_0$ ) was estimated according to Yamaguchi's scheme<sup>2</sup>:

$$y_0 = 1 - \frac{2T}{1 + T^2}$$

$$\text{where } T = \frac{n_{\text{HONO}} - n_{\text{LUNO}}}{2}$$

The singlet-triplet energy gap was estimated using Yamaguchi's approach<sup>3</sup>, which includes the energy difference between BS singlet and open-shell triplet and the correction of spin contamination:

$$\Delta E_{S-T} = \frac{2(E_{\text{BS}} - E_{\text{T}})}{\langle S^2 \rangle_{\text{T}} - \langle S^2 \rangle_{\text{BS}}}$$

Where the  $E_{\text{BS}}$  and  $E_{\text{T}}$  are the total energy of the broken-symmetry singlet state and triplet state,  $\langle S^2 \rangle_{\text{BS}}$  and  $\langle S^2 \rangle_{\text{T}}$  represent the total spin angular momentums of the calculated broken-symmetry singlet state and triplet states.

**Table S2.** Calculations of diradical character with different theoretical methods based on open-shell optimized structures of  $\mathbf{1}^+$

| CAM-B3LYP |      | BHandHLYP |      | LC-BLYP |      | B3LYP |      |
|-----------|------|-----------|------|---------|------|-------|------|
| nLUNO     | y    | nLUNO     | y    | nLUNO   | y    | nLUNO | y    |
| 0.74      | 0.51 | 0.74      | 0.52 | 0.75    | 0.52 | 0.67  | 0.40 |

**Table S3.** Calculated total energies (hartree), relative energies, singlet-triplet gap ( $\Delta E_{S-T}$ ) of the closed-shell singlet (CS), open-shell singlet (OS), and triplet states of  $\mathbf{1}^+$ .

| $\mathbf{1}^+$                                      | Singlet (CS) | Singlet (OS)  | Triplet      |
|-----------------------------------------------------|--------------|---------------|--------------|
| Total energy [Hartree]                              | -4460.049417 | -4460.050766  | -4460.048437 |
| Total energy (+ZPVE)[Hartree]                       | -4459.147003 | -4459.149990  | -4459.146097 |
| Relative energy [kcal/mol]                          | 0            | -0.85         | 0.61         |
| Relative energy (+ZPVE) [kcal/mol]                  | 0            | -1.87         | 0.57         |
| $\Delta E_{S-T} / \Delta E_{S-T}(+ZPVE)$ [kcal/mol] |              | -1.88 / -3.14 |              |

**Table S4.** Calculated total energies (hartree), relative energies, singlet-triplet gap ( $\Delta E_{S-T}$ ) of the closed-shell singlet (CS), open-shell singlet (OS), and triplet states of  $2^+$ .

| $2^+$                                             | Singlet (CS) | Singlet (OS)  | Triplet      |
|---------------------------------------------------|--------------|---------------|--------------|
| Total energy [Hartree]                            | -1592.304318 | -1592.304631  | -1592.301049 |
| Total energy (+ZPVE)[Hartree]                     | -1591.709142 | -1591.711438  | -1591.706803 |
| Relative energy [kcal/mol]                        | 0            | -0.20         | 2.05         |
| Relative energy (+ZPVE) [kcal/mol]                | 0            | -1.44         | 1.46         |
| $\Delta E_{S-T}/\Delta E_{S-T}(+ZPVE)$ [kcal/mol] |              | -3.13 / -4.03 |              |

**Table S5.** Calculated total energies (hartree), relative energies, singlet-triplet gap ( $\Delta E_{S-T}$ ) of the closed-shell singlet (CS) and triplet states of  $3^+$ .

| $3^+$                              | Singlet (CS) | Triplet      |
|------------------------------------|--------------|--------------|
| Total energy [Hartree]             | -4450.410748 | -4450.398708 |
| Total energy (+ZPVE)[Hartree]      | -4449.692746 | -4449.681604 |
| Relative energy [kcal/mol]         | 0            | 7.56         |
| Relative energy (+ZPVE) [kcal/mol] | 0            | 6.99         |

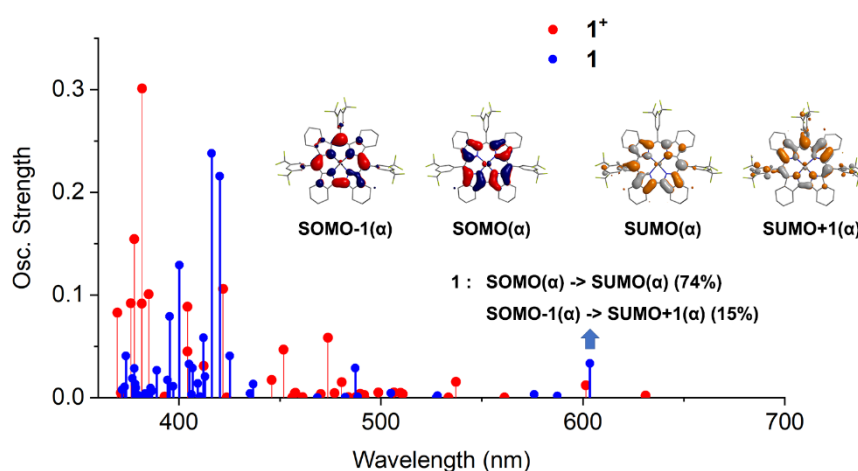

**Figure S16.** The TD-DFT calculated stick spectra of the excited states of  $1^+$  and  $1$ . The electronic transition compositions of  $\alpha$ -spin Q band of  $1$  is analyzed.

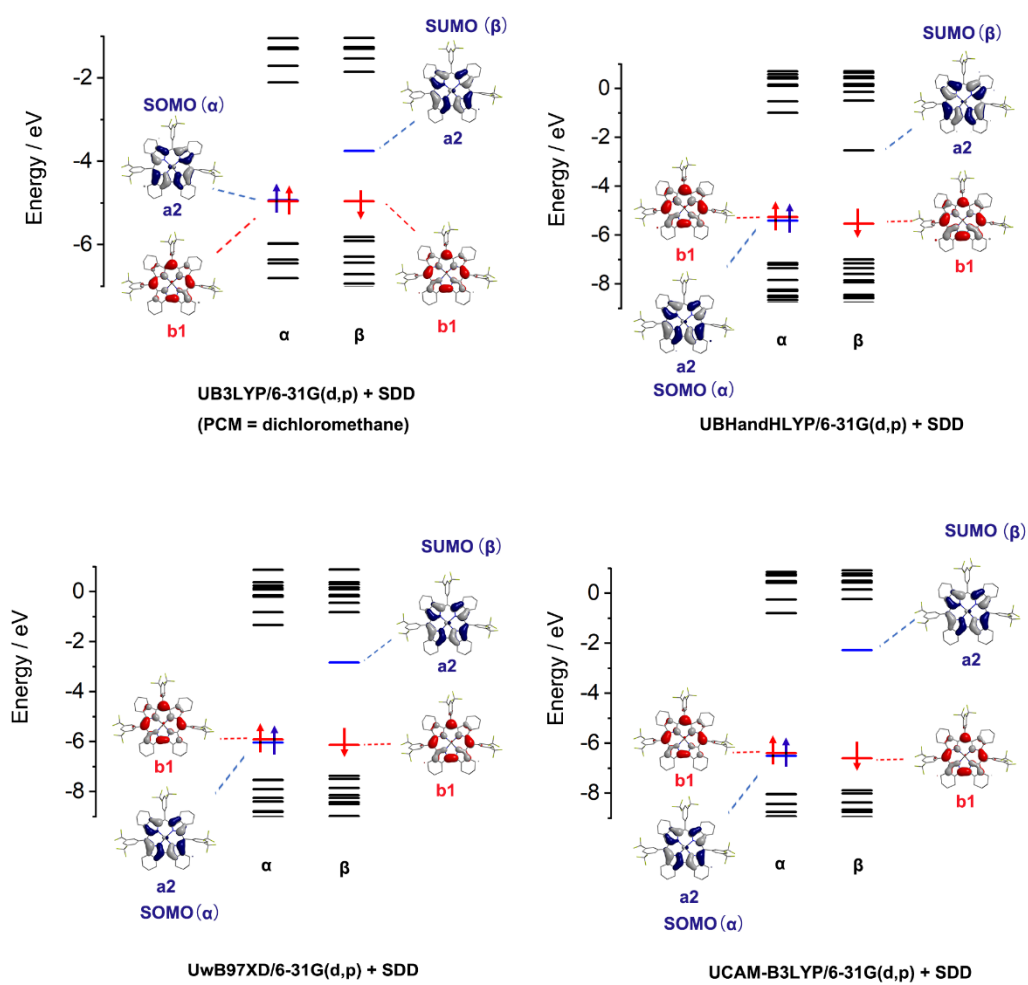

**Figure S17.** DFT calculated frontier molecular orbital diagrams of **1** using various hybrid functionals.

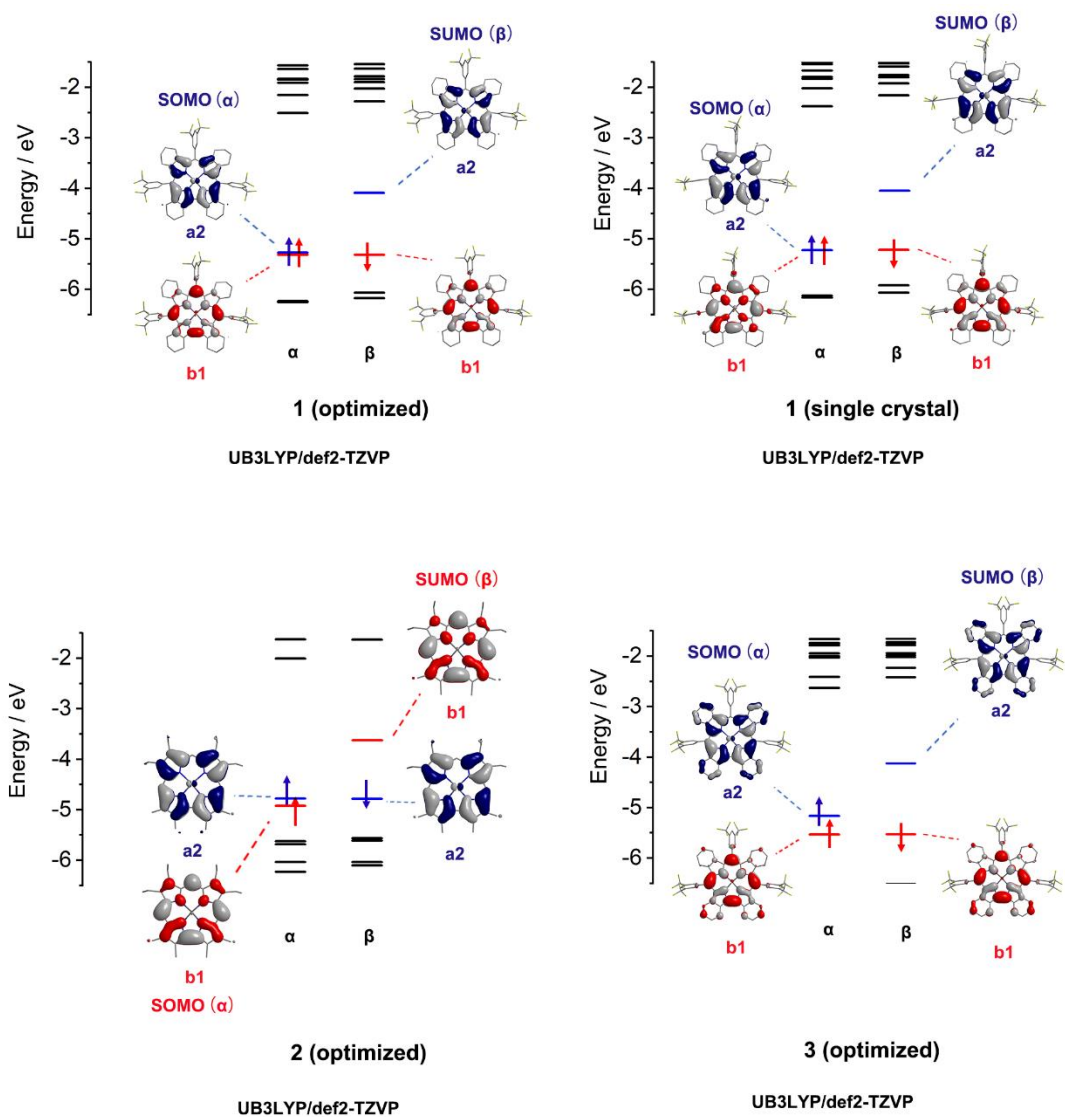

**Figure S18.** DFT calculated frontier molecular orbital diagrams of corrole radicals **1**, **2** and **3** using def2-TZVP bias set.

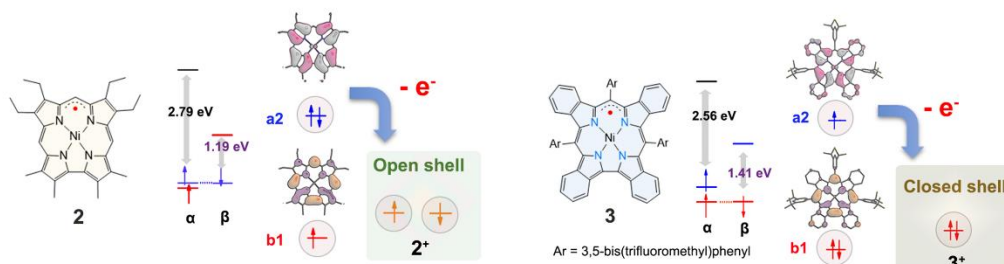

**Figure S19.** Frontier molecular orbital diagrams and isosurfaces (isovalue = 0.03) of **2** and **3**, and the ground states of their one-electron oxidized products **2<sup>+</sup>** and **3<sup>+</sup>** calculated at a UB3LYP/6-31G(d,p)+SDD level of theory.

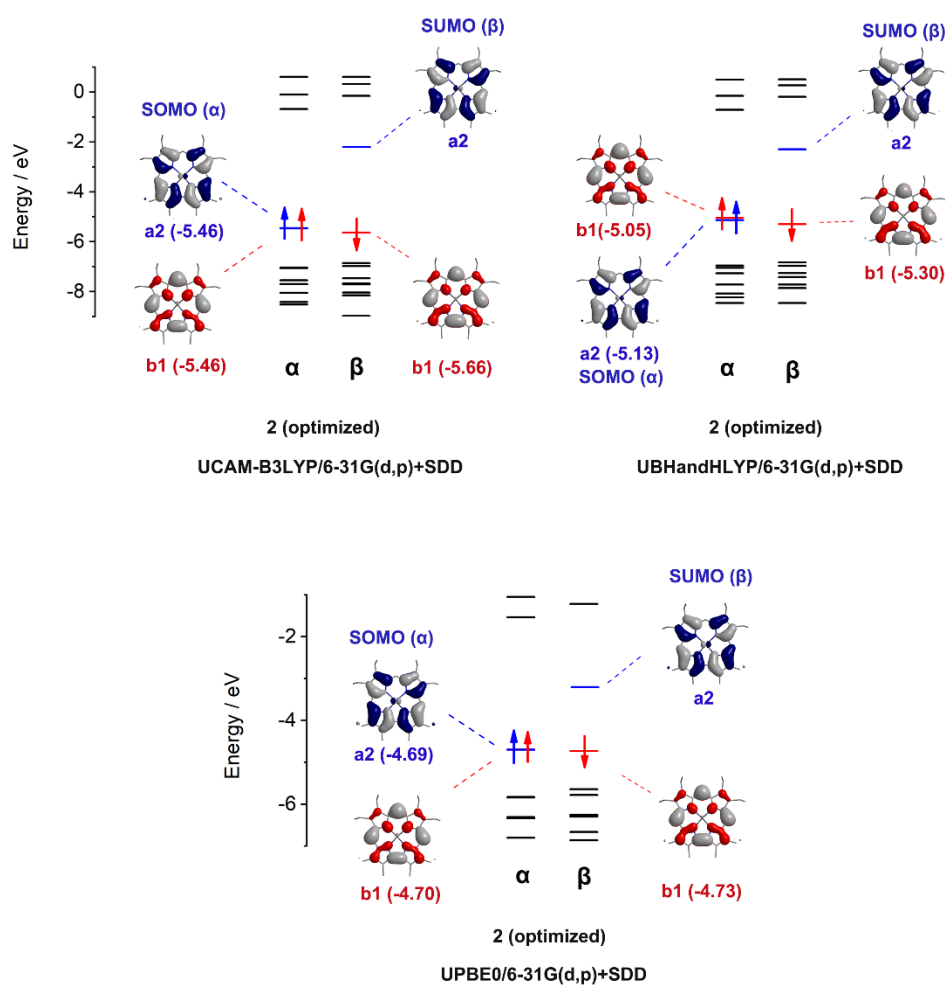

**Figure S20.** DFT calculated frontier molecular orbital diagrams of corrole radical **2** with different functionals.

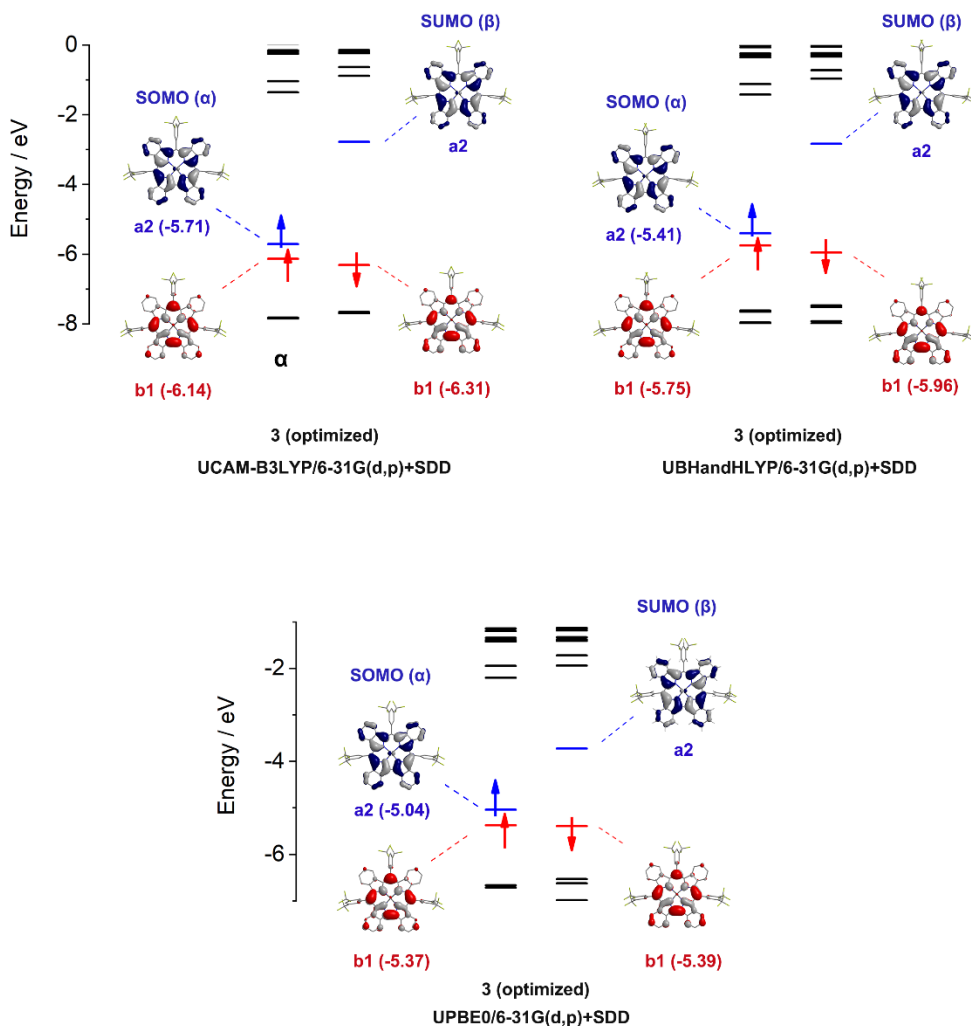

**Figure S21.** DFT calculated frontier molecular orbital diagrams of corrole radical **3** with different functionals.

The structures of compounds **2** and **3** were optimized with various functionals. The frequency calculations were carried out to confirm the minimum nature of the stationary point. Compound **2** always shows degenerate or near-degenerate SOMO-HOMO energy levels with all functionals. At a UB3LYP/6-31G(d,p) (C, N, H)+SDD(Ni) level of theory, the b1 SOMO of **2** lies below the a2 HOMO with a small gap of 0.1 eV. The calculation of the cation **2**<sup>+</sup> also shows a low-lying broken-symmetry singlet diradical ground state as that in **1**<sup>+</sup>. In contrast, the a2 SOMO of **3** is significantly higher than the b1 HOMO with all the functionals. The cation **3**<sup>+</sup> has a larger closed-shell HOMO-LUMO gap (1.47 eV) than those of **1**<sup>+</sup> (1.21 eV) and **2**<sup>+</sup> (1.31 eV). The wavefunction of closed-shell **3**<sup>+</sup> is stable, and no broken-symmetry singlet diradical state can be found by calculation for **3**<sup>+</sup>.



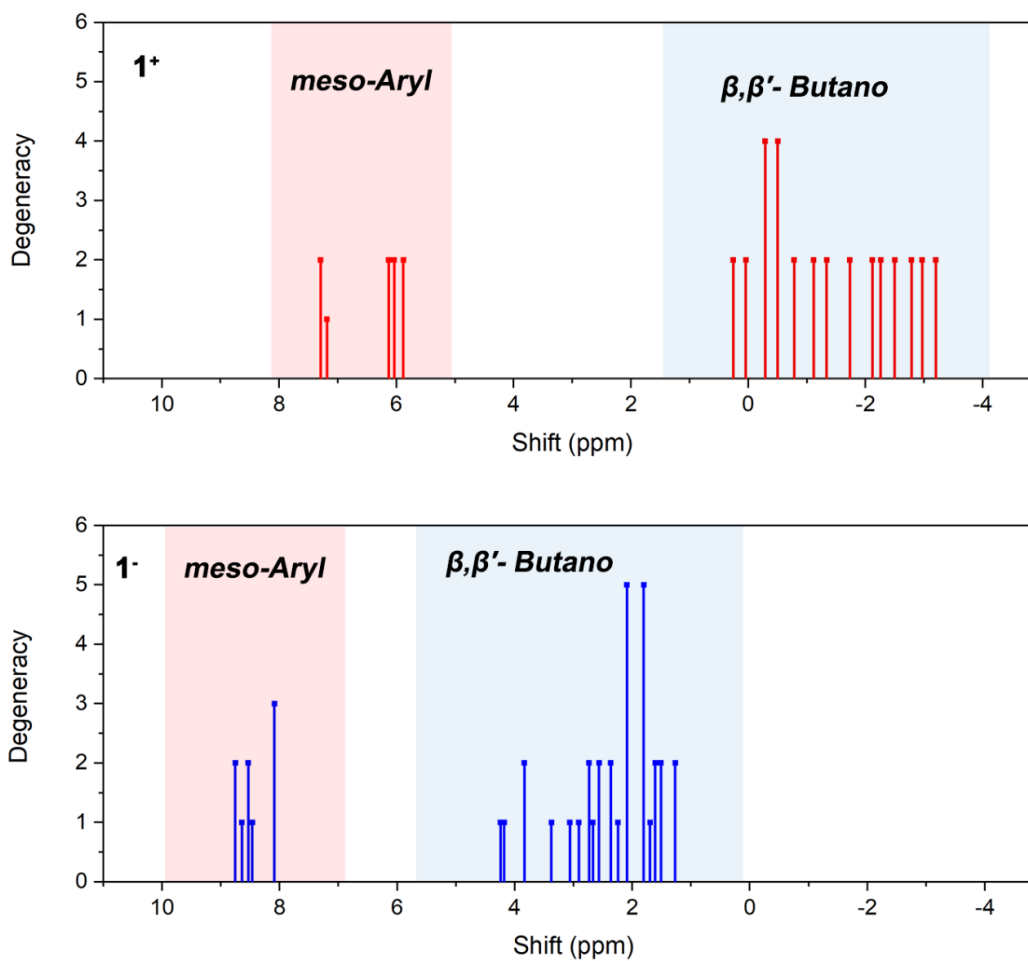

**Figure S22.** DFT calculated NMR chemical shifts of  $1^+$  and  $1^-$  with GIAO method at UB3LYP/6-31g(d,p)+SDD level of theory.

## NICS values

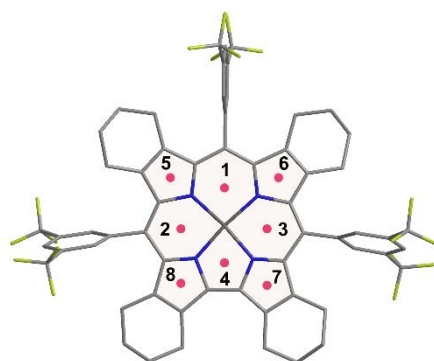

**Table S6.** Singlet-state NICS values of  $1^+$  at various positions calculated at GIAO/RB3LYP (RBHandHLYP) /6-31G(d,p)+SDD level of theory using the closed-shell optimized structure.

| Singlet (CS) | RB3LYP  |                       | RBHandHLYP |                       |
|--------------|---------|-----------------------|------------|-----------------------|
|              | NICS(0) | NICS(1) <sub>zz</sub> | NICS(0)    | NICS(1) <sub>zz</sub> |
| <i>1</i>     | + 59.4  | + 160.9               | +33.9      | +98.5                 |
| <i>2</i>     | +76.1   | +200.6                | +41.6      | +115.4                |
| <i>3</i>     | +76.1   | +202.2                | +41.6      | +114.2                |
| <i>4</i>     | +102.1  | +268.3                | +49.4      | +144.7                |
| <i>5</i>     | +13.2   | +40.1                 | +10.3      | +26.2                 |
| <i>6</i>     | +13.2   | +33.5                 | +10.3      | +22.3                 |
| <i>7</i>     | +16.3   | +49.1                 | +8.1       | +22.1                 |
| <i>8</i>     | +16.3   | +43.6                 | +8.1       | +19.0                 |

**Table S7.** Singlet-state NICS values of  $1^+$  at various positions calculated at GIAO/UB3LYP (UBHandHLYP) /6-31G(d,p)+SDD level of theory using the closed-shell optimized structure.

| Singlet (OS) | UB3LYP  |                       | UBHandHLYP |                       |
|--------------|---------|-----------------------|------------|-----------------------|
|              | NICS(0) | NICS(1) <sub>zz</sub> | NICS(0)    | NICS(1) <sub>zz</sub> |
| <i>1</i>     | + 43.1  | + 118.5               | +11.9      | +41.4                 |
| <i>2</i>     | +55.6   | +149.8                | +16.1      | +50.4                 |
| <i>3</i>     | +55.6   | +148.5                | +16.1      | +49.7                 |
| <i>4</i>     | +74.7   | +199.5                | +18.1      | +64.9                 |
| <i>5</i>     | +10.2   | +29.6                 | +4.7       | +9.0                  |
| <i>6</i>     | +10.2   | +24.8                 | +4.7       | +7.6                  |
| <i>7</i>     | +12.4   | +36.2                 | +3.8       | +7.4                  |
| <i>8</i>     | +12.4   | +32.2                 | +3.8       | +6.3                  |

**Table S8.** Singlet-state NICS values of  $1^+$  at various positions calculated at GIAO/UB3LYP (UBHandHLYP) /6-31G(d,p)+SDD level of theory using the open-shell optimized structure.

| Singlet (OS)     | UB3LYP  |                       | UBHandHLYP |                       |
|------------------|---------|-----------------------|------------|-----------------------|
| <i>Positions</i> | NICS(0) | NICS(1) <sub>zz</sub> | NICS(0)    | NICS(1) <sub>zz</sub> |
| 1                | +46.5   | +127.0                | +13.5      | +45.6                 |
| 2                | +57.1   | +153.3                | +17.2      | +53.2                 |
| 3                | +57.1   | +151.9                | +17.2      | +52.3                 |
| 4                | +71.9   | +192.7                | +18.1      | +65.0                 |
| 5                | +11.0   | +32.7                 | +4.5       | +8.8                  |
| 6                | +11.0   | +26.6                 | +4.5       | +6.9                  |
| 7                | +9.9    | +30.8                 | +3.2       | +6.2                  |
| 8                | +9.9    | +26.1                 | +3.2       | +4.7                  |

**Table S9.** Triplet-state NICS values of  $1^+$  at various positions calculated at GIAO/UB3LYP (UBHandHLYP) /6-31G(d,p)+SDD level of theory using the triplet optimized structure.

| Triplet          | UB3LYP  |                       | UBHandHLYP |                       |
|------------------|---------|-----------------------|------------|-----------------------|
| <i>Positions</i> | NICS(0) | NICS(1) <sub>zz</sub> | NICS(0)    | NICS(1) <sub>zz</sub> |
| 1                | -13.8   | -30.2                 | -19.8      | -41.2                 |
| 2                | -17.4   | -37.1                 | -20.3      | -42.9                 |
| 3                | -17.4   | -36.8                 | -20.3      | -43.0                 |
| 4                | -23.2   | -45.7                 | -26.4      | -46.6                 |
| 5                | -1.1    | -10.1                 | -1.9       | -14.0                 |
| 6                | -1.1    | -7.7                  | -1.9       | -11.3                 |
| 7                | 1.7     | -2.1                  | -0.5       | -9.2                  |
| 8                | 1.7     | -0.6                  | -0.5       | -7.3                  |

## GIMIC ring currents

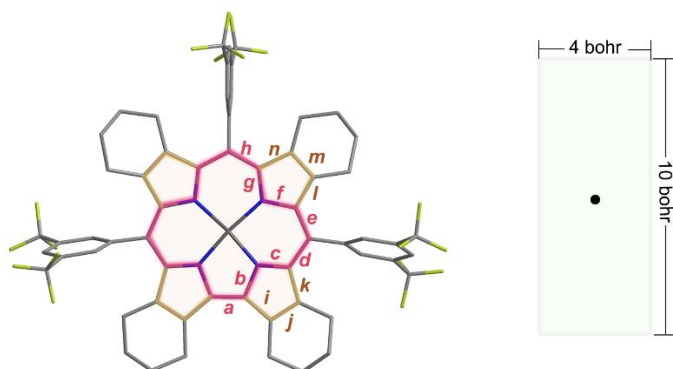

**Table S10.** The ring-current strengths (nA / T) of selected bonds of  $1^+$  in closed-shell and open-shell states using B3LYP and BHandHLYP functionals.

| Bonds    | Current strength (nA/T) |            |        |        |
|----------|-------------------------|------------|--------|--------|
|          | UBHandHLYP              | RBHandHLYP | UB3LYP | RB3LYP |
| <i>a</i> | -27.4                   | -63.2      | -85.8  | -116.2 |
| <i>b</i> | -21.2                   | -46.0      | -61.2  | -82.3  |
| <i>c</i> | -16.2                   | -36.3      | -44.5  | -60.3  |
| <i>d</i> | -22.6                   | -53.6      | -69.3  | -94.4  |
| <i>e</i> | -22.8                   | -54.0      | -69.9  | -95.2  |
| <i>f</i> | -15.9                   | -35.2      | -47.4  | -64.2  |
| <i>g</i> | -12.8                   | -29.7      | -37.0  | -50.6  |
| <i>h</i> | -19.4                   | -47.8      | -58.8  | -80.5  |
| <i>i</i> | -6.9                    | -18.4      | -26.5  | -36.3  |
| <i>j</i> | -7.3                    | -19.9      | -27.0  | -36.8  |
| <i>k</i> | -6.5                    | -17.6      | -25.4  | -34.9  |
| <i>l</i> | -7.0                    | -19.0      | -23.0  | -31.7  |
| <i>m</i> | -7.3                    | -19.6      | -23.6  | -32.3  |
| <i>n</i> | -6.7                    | -18.6      | -22.5  | -31.0  |

## ACID ring currents

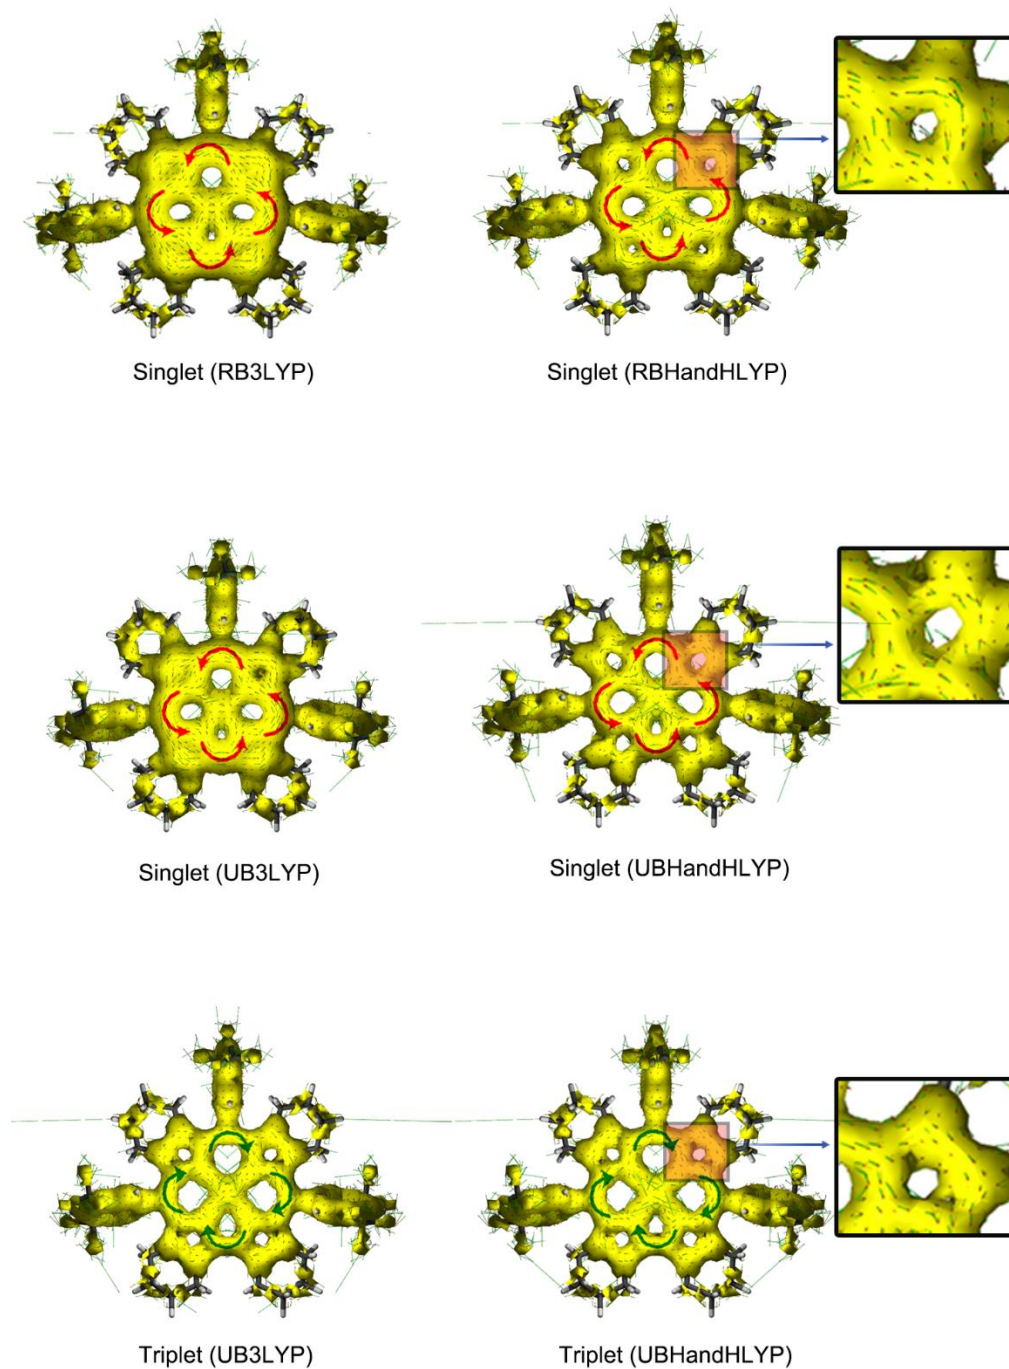

**Figure S23.** ACID plots (isovalue = 0.03) of  $1^+$  calculated in closed-shell singlet, open-shell singlet and triplet states with (U)B3LYP and (U)BHandHLYP functionals, isovalue is 0.03.

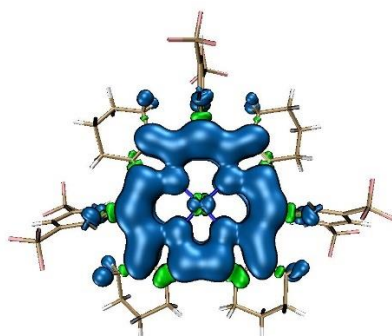

**Figure S24.** Spin density of  $1^+$  in the triplet state (isovalue = 0.001) calculated at UB3LYP/6-31g(d,p)+SDD level of theory.

## 9. Cartesian coordinates for optimized geometries

**Table S11.** Coordinates of the optimized structure for **1** at the UB3LYP/6-31G(d,p) (for C, N, F, H) and SDD (for Ni) level of theory.

| SCF Done: E(UB3LYP) = -4460.26687721 |              |              |              | Sum of electronic and zero-point Energies = -4459.366263   |              |              |              |
|--------------------------------------|--------------|--------------|--------------|------------------------------------------------------------|--------------|--------------|--------------|
| symmetry c1                          |              |              |              | Sum of electronic and thermal Energies = -4459.297873      |              |              |              |
| Charge = 0, Multiplicity = 2         |              |              |              | Sum of electronic and thermal Enthalpies = -4459.296928    |              |              |              |
| Number of Imaginary Frequencies = 0  |              |              |              | Sum of electronic and thermal Free Energies = -4459.483205 |              |              |              |
| Atom                                 | x            | y            | z            | Atom                                                       | x            | y            | z            |
| Ni                                   | 0.013677000  | -0.854456000 | -0.039582000 | C                                                          | -7.375869000 | -3.074065000 | 2.344786000  |
| N                                    | 1.396420000  | 0.432710000  | -0.017054000 | C                                                          | 6.971841000  | -1.696918000 | -1.051102000 |
| N                                    | 1.256612000  | -2.232865000 | -0.128147000 | C                                                          | 7.612375000  | -1.268421000 | 2.658249000  |
| N                                    | -1.412833000 | 0.379186000  | 0.061895000  | C                                                          | -0.488864000 | 5.980185000  | -1.264955000 |
| N                                    | -1.182742000 | -2.278000000 | -0.111941000 | F                                                          | 0.179112000  | 6.360840000  | 3.369733000  |
| C                                    | 2.771481000  | 0.183275000  | -0.040350000 | C                                                          | 7.708058000  | -2.048929000 | -2.316347000 |
| C                                    | 0.754018000  | -3.522941000 | -0.240279000 | C                                                          | 0.703814000  | 6.853487000  | 2.226438000  |
| C                                    | 1.208126000  | 1.787852000  | -0.103556000 | C                                                          | 4.289603000  | 4.029354000  | -1.087402000 |
| C                                    | -0.049216000 | 2.420222000  | 0.003283000  | C                                                          | 5.266682000  | 3.245376000  | -0.213307000 |
| C                                    | 3.469331000  | 1.468002000  | -0.165520000 | C                                                          | -3.018367000 | -6.633055000 | -0.511930000 |
| F                                    | 6.877290000  | -1.791043000 | 3.663493000  | C                                                          | -4.087118000 | -5.801930000 | -1.230617000 |
| C                                    | -0.636583000 | -3.546063000 | -0.267083000 | C                                                          | -5.090362000 | 2.797321000  | 1.767933000  |
| C                                    | -5.409301000 | -2.060854000 | 1.190291000  | C                                                          | -4.474295000 | 3.948774000  | 0.975419000  |
| F                                    | -9.092259000 | -1.059156000 | -2.009413000 | F                                                          | 7.419951000  | -3.313874000 | -2.706593000 |
| C                                    | 2.598286000  | -2.283699000 | -0.074137000 | F                                                          | 9.045870000  | -1.968775000 | -2.170085000 |
| F                                    | 2.050876000  | 6.784425000  | 2.353487000  | F                                                          | 7.356513000  | -1.237226000 | -3.337378000 |
| C                                    | 1.857618000  | -4.445931000 | -0.261968000 | F                                                          | 0.374453000  | 8.158959000  | 2.153041000  |
| C                                    | -1.278044000 | 1.735912000  | 0.164311000  | F                                                          | -2.324047000 | 6.689257000  | -2.567879000 |
| C                                    | -0.085420000 | 3.917113000  | -0.041574000 | F                                                          | -0.549901000 | 6.022710000  | -3.628905000 |

|   |              |              |              |   |              |              |              |
|---|--------------|--------------|--------------|---|--------------|--------------|--------------|
| C | -6.788563000 | -2.273144000 | 1.213570000  | C | -0.971958000 | 6.663298000  | -2.517406000 |
| C | 0.255145000  | 4.681208000  | 1.078767000  | H | -4.795196000 | -2.412927000 | 2.012915000  |
| C | 2.519546000  | 2.443520000  | -0.257804000 | H | 0.541274000  | 4.180864000  | 1.998419000  |
| F | 7.838896000  | 0.028443000  | 2.969601000  | H | 4.965636000  | -1.022994000 | 2.184064000  |
| C | 5.526543000  | -1.200976000 | 1.272345000  | H | 1.134357000  | -6.253287000 | -1.168582000 |
| C | -2.522763000 | -2.369125000 | -0.136642000 | H | 1.449744000  | -6.384636000 | 0.550803000  |
| C | 3.364612000  | -1.084645000 | -0.014020000 | H | -4.778332000 | -4.512790000 | 0.361248000  |
| C | -2.885199000 | -3.773561000 | -0.366773000 | H | -4.862537000 | -3.775583000 | -1.219877000 |
| F | -8.719353000 | -2.976541000 | 2.398833000  | H | -8.667113000 | -1.964795000 | 0.199400000  |
| C | -2.768103000 | 0.065767000  | 0.221309000  | H | 4.981548000  | -3.844752000 | 0.717692000  |
| C | -1.708513000 | -4.492011000 | -0.419888000 | H | 4.924293000  | -4.156494000 | -0.999306000 |
| C | 1.831384000  | -5.944876000 | -0.382462000 | H | -5.166514000 | -0.439140000 | -1.777857000 |
| F | -7.296811000 | -0.751125000 | -3.206661000 | H | -0.935004000 | -6.436361000 | 0.068315000  |
| F | -6.886097000 | -2.681168000 | 3.540535000  | H | -1.223446000 | -6.180209000 | -1.641565000 |
| C | -3.325222000 | -1.207074000 | 0.070787000  | H | 5.085519000  | -1.521724000 | -2.075293000 |
| C | -4.805098000 | -1.396277000 | 0.115436000  | H | 8.708960000  | -1.812047000 | 0.219828000  |
| C | -4.234280000 | -4.411367000 | -0.587599000 | H | -0.149297000 | 7.818379000  | -0.186608000 |
| C | -3.487977000 | 1.300695000  | 0.543009000  | H | -5.217048000 | 0.640309000  | 1.638186000  |
| C | -7.596211000 | -1.807140000 | 0.176298000  | H | -5.605630000 | 1.466248000  | 0.149024000  |
| C | 3.007149000  | -3.696643000 | -0.133952000 | H | 5.352966000  | 1.307771000  | -1.178079000 |
| F | -7.072796000 | -4.389014000 | 2.213030000  | H | 5.487695000  | 1.244852000  | 0.559572000  |
| C | 4.377774000  | -4.321537000 | -0.060145000 | H | 2.154815000  | 4.309300000  | -1.268411000 |
| C | 0.238112000  | 6.077209000  | 1.023746000  | H | 2.758932000  | 4.498708000  | 0.358422000  |
| C | -5.618826000 | -0.945069000 | -0.931175000 | H | 5.269387000  | -6.290959000 | 0.061625000  |
| C | -1.632563000 | -5.977859000 | -0.640780000 | H | 4.022466000  | -5.996287000 | 1.268987000  |
| F | -7.965373000 | 0.795355000  | -1.836761000 | H | -0.722348000 | 4.008468000  | -2.096470000 |
| C | -7.001410000 | -1.136654000 | -0.892382000 | H | 3.238735000  | -7.588181000 | -0.533929000 |
| C | 4.851997000  | -1.239426000 | 0.044468000  | H | 3.485323000  | -6.319847000 | -1.729775000 |
| C | -2.591668000 | 2.328515000  | 0.477310000  | H | -2.437747000 | 4.071989000  | 1.711153000  |
| C | 5.592223000  | -1.486477000 | -1.116108000 | H | -2.614552000 | 4.440631000  | 0.015889000  |
| F | 8.808509000  | -1.893064000 | 2.656867000  | H | 4.560682000  | 5.090115000  | -1.124810000 |
| C | 7.639650000  | -1.648650000 | 0.171012000  | H | 4.335204000  | 3.652089000  | -2.117912000 |
| C | -0.136007000 | 6.736379000  | -0.145581000 | H | 5.195247000  | 3.609029000  | 0.820521000  |
| C | -4.916017000 | 1.477658000  | 1.003341000  | H | 6.301940000  | 3.407394000  | -0.532554000 |
| C | 6.908006000  | -1.394385000 | 1.332390000  | H | -2.983785000 | -7.652117000 | -0.912265000 |
| C | 4.951865000  | 1.741893000  | -0.252346000 | H | -3.284073000 | -6.719547000 | 0.550070000  |
| C | 2.859084000  | 3.887349000  | -0.547723000 | H | -5.053723000 | -6.316906000 | -1.210158000 |
| C | 4.286106000  | -5.833269000 | 0.215291000  | H | -3.809401000 | -5.689443000 | -2.287267000 |
| C | -0.458402000 | 4.585496000  | -1.216124000 | H | -6.155286000 | 2.975634000  | 1.953203000  |
| F | -0.545852000 | 7.941440000  | -2.593747000 | H | -4.603234000 | 2.722459000  | 2.749386000  |
| C | -7.845568000 | -0.545257000 | -1.989919000 | H | -4.661213000 | 4.910588000  | 1.465309000  |
| C | 3.234359000  | -6.502054000 | -0.676335000 | H | -4.955072000 | 4.000506000  | -0.010708000 |
| C | -2.958697000 | 3.759302000  | 0.795778000  |   |              |              |              |

**Table S12.** Coordinates of the optimized singlet structure for  $\mathbf{I}^+$  at the RB3LYP/6-31G(d,p) (for C, N, F, H) and SDD (for Ni) level of theory.

| SCF Done: E(UB3LYP) = -4460.04941679 |              |              |              | Sum of electronic and zero-point Energies = -4459.147003   |              |              |              |
|--------------------------------------|--------------|--------------|--------------|------------------------------------------------------------|--------------|--------------|--------------|
| symmetry c1                          |              |              |              | Sum of electronic and thermal Energies = -4459.078840      |              |              |              |
| Charge = 1, Multiplicity = 1         |              |              |              | Sum of electronic and thermal Enthalpies = -4459.077896    |              |              |              |
| Number of Imaginary Frequencies = 0  |              |              |              | Sum of electronic and thermal Free Energies = -4459.260585 |              |              |              |
| Atom                                 | x            | y            | z            | Atom                                                       | x            | y            | z            |
| C                                    | -2.931418000 | 3.747887000  | 0.099641000  | F                                                          | 0.510003000  | -6.276645000 | -3.463219000 |
| C                                    | -4.294205000 | 4.371739000  | 0.235690000  | F                                                          | -0.073679000 | -8.092782000 | -2.407150000 |
| C                                    | -1.780668000 | 4.486112000  | 0.056260000  | F                                                          | -1.574456000 | -6.610027000 | -2.950595000 |
| C                                    | -1.729851000 | 5.987685000  | 0.073795000  | N                                                          | -1.216848000 | 2.229620000  | 0.002092000  |
| C                                    | -4.188513000 | 5.849550000  | 0.654395000  | N                                                          | 1.217008000  | 2.229569000  | -0.002020000 |
| C                                    | -3.125106000 | 6.590326000  | -0.163266000 | N                                                          | 1.397571000  | -0.427681000 | 0.016313000  |
| C                                    | -2.535214000 | 2.308676000  | 0.033667000  | N                                                          | -1.397521000 | -0.427623000 | -0.016131000 |
| C                                    | -0.681072000 | 3.543240000  | 0.010742000  | Ni                                                         | 0.000051000  | 0.830555000  | 0.000067000  |
| C                                    | 2.931640000  | 3.747762000  | -0.099648000 | C                                                          | 7.533579000  | 2.512076000  | 2.367622000  |
| C                                    | 1.780921000  | 4.486036000  | -0.056278000 | F                                                          | 8.870288000  | 2.383623000  | 2.333989000  |
| C                                    | 1.730162000  | 5.987610000  | -0.073881000 | F                                                          | 7.079065000  | 1.898882000  | 3.479837000  |
| C                                    | 4.294448000  | 4.371556000  | -0.235760000 | F                                                          | 7.249934000  | 3.830196000  | 2.499307000  |
| C                                    | 4.188801000  | 5.849346000  | -0.654550000 | C                                                          | -7.709376000 | 1.044538000  | 2.461063000  |
| C                                    | 3.125448000  | 6.590209000  | 0.163104000  | F                                                          | -7.864126000 | -0.288923000 | 2.620007000  |
| C                                    | 0.681286000  | 3.543211000  | -0.010718000 | F                                                          | -8.932864000 | 1.601058000  | 2.453468000  |
| C                                    | 2.535378000  | 2.308569000  | -0.033606000 | F                                                          | -7.048852000 | 1.498712000  | 3.547123000  |
| C                                    | 3.346502000  | 1.118123000  | 0.009021000  | C                                                          | -7.533362000 | 2.512253000  | -2.367721000 |
| C                                    | 4.830141000  | 1.308786000  | -0.003471000 | F                                                          | -8.870048000 | 2.383502000  | -2.334259000 |
| C                                    | 5.563344000  | 1.128778000  | -1.181710000 | F                                                          | -7.249998000 | 3.830443000  | -2.499263000 |
| C                                    | 6.943577000  | 1.340400000  | -1.194708000 | F                                                          | -7.078580000 | 1.899248000  | -3.479932000 |
| C                                    | 7.607516000  | 1.763051000  | -0.043004000 | H                                                          | -4.894993000 | 3.820088000  | 0.964656000  |
| C                                    | 5.500250000  | 1.722566000  | 1.153350000  | H                                                          | -4.839838000 | 4.294611000  | -0.714088000 |
| C                                    | 6.875477000  | 1.958615000  | 1.128190000  | H                                                          | -1.027167000 | 6.351434000  | -0.682859000 |
| C                                    | 7.709398000  | 1.044064000  | -2.461099000 | H                                                          | -1.337320000 | 6.325135000  | 1.043525000  |
| C                                    | 2.777195000  | -0.145481000 | 0.057863000  | H                                                          | -5.165731000 | 6.326951000  | 0.535266000  |
| C                                    | 3.508485000  | -1.424185000 | 0.144080000  | H                                                          | -3.935972000 | 5.909073000  | 1.721001000  |
| C                                    | 2.590750000  | -2.423684000 | 0.083194000  | H                                                          | -3.111847000 | 7.654015000  | 0.092364000  |
| C                                    | 4.988280000  | -1.660810000 | 0.321482000  | H                                                          | -3.373290000 | 6.524292000  | -1.230194000 |
| C                                    | 2.972924000  | -3.883279000 | 0.078493000  | H                                                          | 1.027516000  | 6.351422000  | 0.682779000  |
| C                                    | 4.481532000  | -4.080485000 | -0.133841000 | H                                                          | 1.337612000  | 6.325029000  | -1.043615000 |
| C                                    | 5.282284000  | -3.110371000 | 0.732957000  | H                                                          | 4.895200000  | 3.819838000  | -0.964707000 |
| C                                    | 1.247050000  | -1.781839000 | 0.027935000  | H                                                          | 4.840098000  | 4.294468000  | 0.714010000  |
| C                                    | -0.000016000 | -2.446372000 | 0.000104000  | H                                                          | 5.166040000  | 6.326716000  | -0.535479000 |
| C                                    | -0.000058000 | -3.946260000 | 0.000028000  | H                                                          | 3.936227000  | 5.908816000  | -1.721151000 |
| C                                    | 0.095347000  | -4.658726000 | 1.200083000  | H                                                          | 3.112223000  | 7.653885000  | -0.092584000 |



|   |              |              |              |   |              |              |              |
|---|--------------|--------------|--------------|---|--------------|--------------|--------------|
| C | -0.095535000 | -4.658563000 | -1.200127000 | H | 3.373664000  | 6.524224000  | 1.230028000  |
| C | -0.109142000 | -6.054864000 | -1.197228000 | H | 5.058297000  | 0.822338000  | -2.092244000 |
| C | -0.000216000 | -6.762611000 | -0.000155000 | H | 8.676053000  | 1.939938000  | -0.059183000 |
| C | 0.108798000  | -6.055035000 | 1.197003000  | H | 4.949038000  | 1.863390000  | 2.077852000  |
| C | -0.305639000 | -6.773070000 | -2.509110000 | H | 5.392570000  | -0.973174000 | 1.068829000  |
| C | 0.305031000  | -6.773391000 | 2.508840000  | H | 5.520291000  | -1.432617000 | -0.610310000 |
| C | -1.247057000 | -1.781786000 | -0.027713000 | H | 2.423262000  | -4.420018000 | -0.697470000 |
| C | -2.590785000 | -2.423578000 | -0.082954000 | H | 2.675361000  | -4.348148000 | 1.026610000  |
| C | -3.508478000 | -1.424042000 | -0.143868000 | H | 4.741810000  | -5.118663000 | 0.094087000  |
| C | -2.973030000 | -3.883155000 | -0.078158000 | H | 4.730527000  | -3.916824000 | -1.190480000 |
| C | -5.282367000 | -3.110181000 | -0.732611000 | H | 6.356572000  | -3.299414000 | 0.645671000  |
| C | -4.988285000 | -1.660605000 | -0.321246000 | H | 5.018617000  | -3.256682000 | 1.788408000  |
| C | -4.481640000 | -4.080271000 | 0.134236000  | H | 0.163677000  | -4.122741000 | 2.141813000  |
| C | -2.777134000 | -0.145366000 | -0.057702000 | H | -0.163800000 | -4.122451000 | -2.141787000 |
| C | -3.346388000 | 1.118262000  | -0.008924000 | H | -0.000269000 | -7.845627000 | -0.000225000 |
| C | -4.830021000 | 1.308990000  | 0.003511000  | H | -2.675521000 | -4.348102000 | -1.026254000 |
| C | -5.563263000 | 1.129093000  | 1.181743000  | H | -2.423370000 | -4.419872000 | 0.697821000  |
| C | -6.943488000 | 1.340776000  | 1.194689000  | H | -5.018732000 | -3.256581000 | -1.788058000 |
| C | -5.500077000 | 1.722722000  | -1.153358000 | H | -6.356663000 | -3.299165000 | -0.645288000 |
| C | -7.607375000 | 1.763375000  | 0.042935000  | H | -5.392538000 | -0.973003000 | -1.068645000 |
| C | -6.875296000 | 1.958828000  | -1.128253000 | H | -5.520283000 | -1.432311000 | 0.610529000  |
| F | 8.933001000  | 1.600325000  | -2.453490000 | H | -4.730597000 | -3.916518000 | 1.190870000  |
| F | 7.863864000  | -0.289427000 | -2.620105000 | H | -4.741978000 | -5.118453000 | -0.093606000 |
| F | 7.048960000  | 1.498422000  | -3.547134000 | H | -5.058257000 | 0.822692000  | 2.092312000  |
| F | 1.573506000  | -6.609656000 | 2.951056000  | H | -4.948837000 | 1.863461000  | -2.077855000 |
| F | -0.511436000 | -6.277649000 | 3.462601000  | H | -8.675907000 | 1.940305000  | 0.059071000  |
| F | 0.073922000  | -8.093219000 | 2.406501000  |   |              |              |              |

**Table S13.** Coordinates of the optimized broken-symmetry singlet structure for  $1^+$  at the UB3LYP/6-31G(d,p) (for C, N, F, H) and SDD (for Ni) level of theory.

| SCF Done: E(UB3LYP) = -4460.05076593 |              |             |              | Sum of electronic and zero-point Energies = -4459.149990   |              |              |              |
|--------------------------------------|--------------|-------------|--------------|------------------------------------------------------------|--------------|--------------|--------------|
| symmetry c1                          |              |             |              | Sum of electronic and thermal Energies = -4459.081725      |              |              |              |
| Charge = 1, Multiplicity = 1         |              |             |              | Sum of electronic and thermal Enthalpies = -4459.080781    |              |              |              |
| Number of Imaginary Frequencies = 0  |              |             |              | Sum of electronic and thermal Free Energies = -4459.263748 |              |              |              |
| Atom                                 | x            | y           | z            | Atom                                                       | x            | y            | z            |
| C                                    | -2.944925000 | 3.749508000 | 0.097612000  | F                                                          | 0.559187000  | -6.264267000 | -3.455385000 |
| C                                    | -4.302709000 | 4.384552000 | 0.233996000  | F                                                          | -0.039925000 | -8.080176000 | -2.407519000 |
| C                                    | -1.782807000 | 4.483484000 | 0.058366000  | F                                                          | -1.532450000 | -6.597009000 | -2.972409000 |
| C                                    | -1.725666000 | 5.985787000 | 0.085066000  | N                                                          | -1.217674000 | 2.245194000  | -0.006356000 |
| C                                    | -4.185945000 | 5.858328000 | 0.663523000  | N                                                          | 1.217683000  | 2.245187000  | 0.006294000  |
| C                                    | -3.117957000 | 6.596008000 | -0.150922000 | N                                                          | 1.405464000  | -0.422187000 | 0.020722000  |
| C                                    | -2.556301000 | 2.319319000 | 0.027236000  | N                                                          | -1.405467000 | -0.422180000 | -0.020806000 |

|   |              |              |              |    |              |              |              |
|---|--------------|--------------|--------------|----|--------------|--------------|--------------|
| C | -0.699486000 | 3.532674000  | 0.008900000  | Ni | 0.000001000  | 0.839005000  | -0.000039000 |
| C | 2.944943000  | 3.749494000  | -0.097647000 | C  | 7.548733000  | 2.520251000  | 2.349128000  |
| C | 1.782828000  | 4.483475000  | -0.058405000 | F  | 8.885100000  | 2.391561000  | 2.307067000  |
| C | 1.725697000  | 5.985779000  | -0.085077000 | F  | 7.101459000  | 1.911619000  | 3.466720000  |
| C | 4.302733000  | 4.384531000  | -0.233996000 | F  | 7.265412000  | 3.838559000  | 2.476680000  |
| C | 4.185986000  | 5.858317000  | -0.663493000 | C  | -7.699194000 | 0.996336000  | 2.463908000  |
| C | 3.117988000  | 6.595987000  | 0.150948000  | F  | -7.848269000 | -0.339954000 | 2.603420000  |
| C | 0.699502000  | 3.532670000  | -0.008954000 | F  | -8.924724000 | 1.548127000  | 2.468102000  |
| C | 2.556310000  | 2.319306000  | -0.027301000 | F  | -7.036687000 | 1.437047000  | 3.554016000  |
| C | 3.346002000  | 1.139746000  | 0.016454000  | C  | -7.548785000 | 2.520253000  | -2.349100000 |
| C | 4.830372000  | 1.316043000  | -0.002225000 | F  | -8.885152000 | 2.391574000  | -2.307003000 |
| C | 5.557369000  | 1.112626000  | -1.180328000 | F  | -7.265458000 | 3.838559000  | -2.476671000 |
| C | 6.938796000  | 1.313950000  | -1.199230000 | F  | -7.101544000 | 1.911609000  | -3.466698000 |
| C | 7.609325000  | 1.744292000  | -0.053997000 | H  | -4.911720000 | 3.832242000  | 0.955843000  |
| C | 5.505070000  | 1.738926000  | 1.148096000  | H  | -4.845137000 | 4.321174000  | -0.718664000 |
| C | 6.882538000  | 1.960402000  | 1.116673000  | H  | -1.021379000 | 6.353102000  | -0.668089000 |
| C | 7.699257000  | 0.996315000  | -2.463869000 | H  | -1.335625000 | 6.317709000  | 1.057640000  |
| C | 2.772725000  | -0.147211000 | 0.070605000  | H  | -5.159841000 | 6.343652000  | 0.548716000  |
| C | 3.505778000  | -1.410650000 | 0.168804000  | H  | -3.931679000 | 5.908829000  | 1.730198000  |
| C | 2.584363000  | -2.419756000 | 0.111685000  | H  | -3.099478000 | 7.658844000  | 0.108157000  |
| C | 4.985430000  | -1.649421000 | 0.355180000  | H  | -3.366431000 | 6.534850000  | -1.218179000 |
| C | 2.973028000  | -3.878351000 | 0.127890000  | H  | 1.021400000  | 6.353084000  | 0.668074000  |
| C | 4.483531000  | -4.074572000 | -0.071000000 | H  | 1.335676000  | 6.317723000  | -1.057651000 |
| C | 5.274821000  | -3.092784000 | 0.790830000  | H  | 4.911751000  | 3.832232000  | -0.955846000 |
| C | 1.253700000  | -1.781845000 | 0.039928000  | H  | 4.845146000  | 4.321126000  | 0.718671000  |
| C | -0.000006000 | -2.437580000 | -0.000046000 | H  | 5.159883000  | 6.343632000  | -0.548658000 |
| C | -0.000011000 | -3.936225000 | -0.000023000 | H  | 3.931740000  | 5.908842000  | -1.730171000 |
| C | 0.079156000  | -4.646030000 | 1.202326000  | H  | 3.099521000  | 7.658828000  | -0.108109000 |
| C | -0.079176000 | -4.646065000 | -1.202352000 | H  | 3.366443000  | 6.534806000  | 1.218208000  |
| C | -0.092111000 | -6.042242000 | -1.198723000 | H  | 5.047479000  | 0.798106000  | -2.085330000 |
| C | -0.000010000 | -6.749529000 | 0.000017000  | H  | 8.679295000  | 1.911658000  | -0.075074000 |
| C | 0.092091000  | -6.042207000 | 1.198737000  | H  | 4.956423000  | 1.898381000  | 2.070974000  |
| C | -0.270168000 | -6.760675000 | -2.513436000 | H  | 5.391565000  | -0.951999000 | 1.092024000  |
| C | 0.270148000  | -6.760604000 | 2.513471000  | H  | 5.521353000  | -1.441101000 | -0.579028000 |
| C | -1.253710000 | -1.781839000 | -0.040021000 | H  | 2.430826000  | -4.428625000 | -0.643675000 |
| C | -2.584377000 | -2.419746000 | -0.111728000 | H  | 2.672642000  | -4.331310000 | 1.081009000  |
| C | -3.505789000 | -1.410636000 | -0.168845000 | H  | 4.743927000  | -5.109581000 | 0.170921000  |
| C | -2.973048000 | -3.878339000 | -0.127881000 | H  | 4.740798000  | -3.922636000 | -1.127440000 |
| C | -5.274859000 | -3.092781000 | -0.790765000 | H  | 6.350040000  | -3.282579000 | 0.717296000  |
| C | -4.985448000 | -1.649407000 | -0.355166000 | H  | 5.000288000  | -3.224684000 | 1.845478000  |
| C | -4.483545000 | -4.074548000 | 0.071066000  | H  | 0.135117000  | -4.109903000 | 2.144703000  |
| C | -2.772729000 | -0.147198000 | -0.070682000 | H  | -0.135135000 | -4.109964000 | -2.144744000 |
| C | -3.345998000 | 1.139762000  | -0.016521000 | H  | -0.000010000 | -7.832549000 | 0.000033000  |
| C | -4.830367000 | 1.316062000  | 0.002196000  | H  | -2.672698000 | -4.331324000 | -1.080998000 |

|   |              |              |              |   |              |              |              |
|---|--------------|--------------|--------------|---|--------------|--------------|--------------|
| C | -5.557337000 | 1.112646000  | 1.180315000  | H | -2.430822000 | -4.428595000 | 0.643680000  |
| C | -6.938764000 | 1.313967000  | 1.199249000  | H | -5.000363000 | -3.224712000 | -1.845418000 |
| C | -5.505094000 | 1.738940000  | -1.148111000 | H | -6.350077000 | -3.282570000 | -0.717189000 |
| C | -7.609321000 | 1.744304000  | 0.054031000  | H | -5.391605000 | -0.952005000 | -1.092016000 |
| C | -6.882561000 | 1.960412000  | -1.116658000 | H | -5.521339000 | -1.441058000 | 0.579054000  |
| F | 8.924783000  | 1.548116000  | -2.468040000 | H | -4.740776000 | -3.922582000 | 1.127511000  |
| F | 7.848347000  | -0.339975000 | -2.603366000 | H | -4.743953000 | -5.109563000 | -0.170817000 |
| F | 7.036771000  | 1.437010000  | -3.553997000 | H | -5.047425000 | 0.798128000  | 2.085307000  |
| F | 1.532430000  | -6.596925000 | 2.972439000  | H | -4.956469000 | 1.898392000  | -2.071003000 |
| F | -0.559207000 | -6.264168000 | 3.455405000  | H | -8.679290000 | 1.911668000  | 0.075132000  |
| F | 0.039904000  | -8.080108000 | 2.407591000  |   |              |              |              |

**Table S14.** Coordinates of the optimized triplet structure for  $1^+$  at the UB3LYP/6-31G(d,p) (for C, N, F, H) and SDD (for Ni) level of theory.

| SCF Done: E(UB3LYP) = -4460.04843735 |              |              |              | Sum of electronic and zero-point Energies = -4459.146097   |              |              |              |
|--------------------------------------|--------------|--------------|--------------|------------------------------------------------------------|--------------|--------------|--------------|
| symmetry c1                          |              |              |              | Sum of electronic and thermal Energies = -4459.077970      |              |              |              |
| Charge = -1, Multiplicity = 3        |              |              |              | Sum of electronic and thermal Enthalpies = -4459.077026    |              |              |              |
| Number of Imaginary Frequencies = 0  |              |              |              | Sum of electronic and thermal Free Energies = -4459.260990 |              |              |              |
| Atom                                 | x            | y            | z            | Atom                                                       | x            | y            | z            |
| C                                    | -2.951785000 | -3.749365000 | -0.096991000 | F                                                          | 0.581380000  | 6.254611000  | 3.451773000  |
| C                                    | -4.307048000 | -4.390806000 | -0.233419000 | F                                                          | -0.024192000 | 8.070699000  | 2.407842000  |
| C                                    | -1.783810000 | -4.482072000 | -0.060193000 | F                                                          | -1.513284000 | 6.587640000  | 2.982163000  |
| C                                    | -1.723760000 | -5.984544000 | -0.092908000 | N                                                          | -1.217652000 | -2.254784000 | 0.011118000  |
| C                                    | -4.184339000 | -5.861504000 | -0.671483000 | N                                                          | 1.217878000  | -2.254703000 | -0.011110000 |
| C                                    | -3.114578000 | -6.599110000 | 0.140632000  | N                                                          | 1.410695000  | 0.417669000  | -0.024774000 |
| C                                    | -2.567345000 | -2.326525000 | -0.023767000 | N                                                          | -1.410647000 | 0.417570000  | 0.024903000  |
| C                                    | -0.707640000 | -3.528241000 | -0.007875000 | Ni                                                         | 0.000066000  | -0.846446000 | 0.000032000  |
| C                                    | 2.952114000  | -3.749171000 | 0.096935000  | C                                                          | 7.557047000  | -2.526363000 | -2.337640000 |
| C                                    | 1.784187000  | -4.481955000 | 0.060149000  | F                                                          | 8.893259000  | -2.397906000 | -2.290550000 |
| C                                    | 1.724242000  | -5.984433000 | 0.092770000  | F                                                          | 7.114404000  | -1.920483000 | -3.458592000 |
| C                                    | 4.307429000  | -4.390527000 | 0.233232000  | F                                                          | 7.273500000  | -3.844611000 | -2.462429000 |
| C                                    | 4.184848000  | -5.861264000 | 0.671204000  | C                                                          | -7.693518000 | -0.965496000 | -2.464309000 |
| C                                    | 3.115088000  | -6.598889000 | -0.140893000 | F                                                          | -7.839409000 | 0.372578000  | -2.590699000 |
| C                                    | 0.707952000  | -3.528194000 | 0.007864000  | F                                                          | -8.920184000 | -1.514413000 | -2.475793000 |
| C                                    | 2.567575000  | -2.326352000 | 0.023830000  | F                                                          | -7.030056000 | -1.396760000 | -3.557406000 |
| C                                    | 3.346082000  | -1.150245000 | -0.020654000 | C                                                          | -7.557009000 | -2.526223000 | 2.337752000  |
| C                                    | 4.830598000  | -1.318797000 | 0.001537000  | F                                                          | -8.893224000 | -2.397841000 | 2.290526000  |
| C                                    | 5.554223000  | -1.100629000 | 1.178991000  | F                                                          | -7.273406000 | -3.844424000 | 2.462907000  |
| C                                    | 6.936261000  | -1.296240000 | 1.201236000  | F                                                          | -7.114481000 | -1.920030000 | 3.458581000  |

|   |             |             |             |   |             |             |             |
|---|-------------|-------------|-------------|---|-------------|-------------|-------------|
| C | 7.61028000  | -1.73248300 | 0.06018700  | H | -4.92142000 | -3.83763200 | -0.95015400 |
| C | 5.50760800  | -1.74892300 | -1.14449400 | H | -4.84715100 | -4.33730000 | 0.72118400  |
| C | 6.88628700  | -1.96192100 | -1.10959900 | H | -1.01911100 | -6.35448900 | 0.65852000  |
| C | 7.69385300  | -0.96442100 | 2.46401900  | H | -1.33407800 | -6.31271800 | -1.06692900 |
| C | 2.77143400  | 0.14641600  | -0.07822000 | H | -5.15658300 | -6.35118400 | -0.56065300 |
| C | 3.50529500  | 1.40445400  | -0.18305700 | H | -3.92832700 | -5.90516100 | -1.73806600 |
| C | 2.58237000  | 2.41694200  | -0.12776100 | H | -3.09335000 | -7.66108400 | -0.12196600 |
| C | 4.98439300  | 1.64415900  | -0.37514800 | H | -3.36391100 | -6.54222600 | 1.20799400  |
| C | 2.97282900  | 3.87544600  | -0.15454500 | H | 1.01957700  | -6.35437600 | -0.65864400 |
| C | 4.48432200  | 4.07174700  | 0.03657600  | H | 1.33463700  | -6.31270100 | 1.06679200  |
| C | 5.27088000  | 3.08432600  | -0.82297000 | H | 4.92180200  | -3.83736100 | 0.94997200  |
| C | 1.25887900  | 1.77942100  | -0.04746600 | H | 4.84747100  | -4.33691000 | -0.72139900 |
| C | -0.00004500 | 2.43078800  | 0.00009900  | H | 5.15711800  | -6.35087000 | 0.56027900  |
| C | -0.00011800 | 3.92858800  | 0.00008700  | H | 3.92890600  | -5.90501200 | 1.73780000  |
| C | 0.07131800  | 4.63684800  | -1.20341400 | H | 3.09394800  | -7.66088100 | 0.12163700  |
| C | -0.07173700 | 4.63684700  | 1.20357700  | H | 3.36435200  | -6.54191800 | -1.20826700 |
| C | -0.08445300 | 6.03293500  | 1.19953100  | H | 5.04166800  | -0.78051400 | 2.08047600  |
| C | -0.00041800 | 6.73999100  | 0.00007000  | H | 8.68103000  | -1.89434400 | 0.08395600  |
| C | 0.08374400  | 6.03294000  | -1.19938400 | H | 4.96012200  | -1.92059800 | -2.06577900 |
| C | -0.25399300 | 6.75145200  | 2.51559000  | H | 5.39051700  | 0.94150500  | -1.10690000 |
| C | 0.25309700  | 6.75147500  | -2.51545800 | H | 5.52291800  | 1.44538400  | 0.55961700  |
| C | -1.25891800 | 1.77933000  | 0.04764100  | H | 2.43492700  | 4.43169400  | 0.61569100  |
| C | -2.58244700 | 2.41676900  | 0.12786600  | H | 2.67000600  | 4.32267700  | -1.10960300 |
| C | -3.50531200 | 1.40422600  | 0.18316600  | H | 4.74413300  | 5.10515700  | -0.21270900 |
| C | -2.97298800 | 3.87525200  | 0.15459700  | H | 4.74640400  | 3.92597300  | 1.09270200  |
| C | -5.27100100 | 3.08401500  | 0.82300700  | H | 6.34646200  | 3.27469200  | -0.75660500 |
| C | -4.98442700 | 1.64385400  | 0.37522200  | H | 4.99060400  | 3.20888100  | -1.87701800 |
| C | -4.48448900 | 4.07146300  | -0.03655100 | H | 0.12152900  | 4.10084600  | -2.14614600 |
| C | -2.77136900 | 0.14623000  | 0.07834600  | H | -0.12188700 | 4.10084700  | 2.14631400  |
| C | -3.34593100 | -1.15047100 | 0.02075500  | H | -0.00053200 | 7.82302100  | 0.00006400  |
| C | -4.83043500 | -1.31911600 | -0.00151500 | H | -2.67020700 | 4.32252500  | 1.10964900  |
| C | -5.55397900 | -1.10127600 | -1.17908000 | H | -2.43509800 | 4.43150900  | -0.61564300 |
| C | -6.93600400 | -1.29697000 | -1.20138800 | H | -4.99074900 | 3.20861000  | 1.87705700  |
| C | -5.50751300 | -1.74899600 | 1.14456700  | H | -6.34659200 | 3.27431800  | 0.75662300  |
| C | -7.61009200 | -1.73295800 | -0.06028100 | H | -5.39052900 | 0.94119300  | 1.10698100  |
| C | -6.88618000 | -1.96206700 | 1.10961800  | H | -5.52292400 | 1.44503300  | -0.55954800 |
| F | 8.92057300  | -1.51321600 | 2.47551800  | H | -4.74654500 | 3.92564800  | -1.09267700 |
| F | 7.83962500  | 0.37369500  | 2.59011300  | H | -4.74436400 | 5.10486300  | 0.21270700  |
| F | 7.03053100  | -1.39551500 | 3.55726900  | H | -5.04136900 | -0.78136500 | -2.08060600 |
| F | 1.51239100  | 6.58786300  | -2.98209600 | H | -4.96009400 | -1.92040600 | 2.06594200  |
| F | -0.58224400 | 6.25449300  | -3.45159300 | H | -8.68083300 | -1.89487200 | -0.08409100 |
| F | 0.02309000  | 8.07068400  | -2.40770700 |   |             |             |             |

**Table S15.** Coordinates of the optimized structure for **2** at the UB3LYP/6-31G(d,p) (for C, N, H) and SDD ( for Ni) level of theory.

| SCF Done: E(UB3LYP) = -1592.50902605 |              |              |              | Sum of electronic and zero-point Energies = -1591.916550   |              |              |              |
|--------------------------------------|--------------|--------------|--------------|------------------------------------------------------------|--------------|--------------|--------------|
| symmetry c1                          |              |              |              | Sum of electronic and thermal Energies = -1591.880470      |              |              |              |
| Charge = 0, Multiplicity = 2         |              |              |              | Sum of electronic and thermal Enthalpies = -1591.879526    |              |              |              |
| Number of Imaginary Frequencies = 0  |              |              |              | Sum of electronic and thermal Free Energies = -1591.984865 |              |              |              |
| Atom                                 | x            | y            | z            | Atom                                                       | x            | y            | z            |
| C                                    | 3.032355000  | 0.727951000  | -0.100334000 | H                                                          | 0.706019000  | 4.400793000  | -0.030345000 |
| C                                    | 3.965477000  | 1.827419000  | -0.141484000 | H                                                          | -3.994331000 | -0.003258000 | 0.134895000  |
| C                                    | 3.200443000  | 2.987902000  | -0.115980000 | H                                                          | 0.713166000  | -4.399459000 | -0.020711000 |
| C                                    | 1.812800000  | 2.581765000  | -0.059322000 | H                                                          | 4.690886000  | 4.498441000  | -0.508723000 |
| N                                    | 1.772305000  | 1.211670000  | -0.051324000 | H                                                          | 3.029983000  | 5.043052000  | -0.740497000 |
| C                                    | 0.639907000  | 3.317692000  | -0.021855000 | H                                                          | 3.673318000  | 4.842970000  | 0.890013000  |
| C                                    | -0.656891000 | 2.746126000  | 0.025302000  | H                                                          | 5.804703000  | 1.100836000  | -1.016286000 |
| C                                    | -1.900673000 | 3.478808000  | 0.067434000  | H                                                          | 5.910557000  | 2.723155000  | -0.332552000 |
| C                                    | -2.915420000 | 2.540802000  | 0.098761000  | H                                                          | 5.878941000  | 1.320286000  | 0.731727000  |
| C                                    | -2.277646000 | 1.245737000  | 0.071697000  | H                                                          | 5.921874000  | -2.715943000 | -0.074278000 |
| N                                    | -0.912370000 | 1.399874000  | 0.028547000  | H                                                          | 5.815934000  | -1.322601000 | -1.145903000 |
| C                                    | -2.909830000 | -0.001932000 | 0.093138000  | H                                                          | 5.867831000  | -1.087623000 | 0.601001000  |
| C                                    | -2.274381000 | -1.250518000 | 0.070845000  | H                                                          | 3.052341000  | -5.052489000 | 0.470943000  |
| C                                    | -2.910381000 | -2.545754000 | 0.100595000  | H                                                          | 3.670371000  | -4.812012000 | -1.164011000 |
| C                                    | -1.894097000 | -3.482645000 | 0.070516000  | H                                                          | 4.707133000  | -4.496077000 | 0.227091000  |
| C                                    | -0.651689000 | -2.748637000 | 0.025815000  | H                                                          | -3.006387000 | -5.275889000 | -0.255893000 |
| N                                    | -0.910355000 | -1.401433000 | 0.026145000  | H                                                          | -1.293683000 | -5.440918000 | -0.558501000 |
| C                                    | 0.644887000  | -3.316388000 | -0.018722000 | H                                                          | -0.842739000 | -5.309858000 | 1.936361000  |
| C                                    | 1.818549000  | -2.578589000 | -0.062295000 | H                                                          | -2.576850000 | -5.162899000 | 2.227962000  |
| C                                    | 3.205579000  | -2.982118000 | -0.107371000 | H                                                          | -1.923266000 | -6.655459000 | 1.527664000  |
| C                                    | 3.969228000  | -1.819314000 | -0.132625000 | H                                                          | -4.890175000 | -2.052546000 | 0.751404000  |
| C                                    | 3.034764000  | -0.722778000 | -0.102973000 | H                                                          | -4.598258000 | -3.765689000 | 0.572334000  |
| N                                    | 1.774675000  | -1.209088000 | -0.061459000 | H                                                          | -6.111152000 | -2.936923000 | -1.236907000 |
| Ni                                   | 0.361011000  | 0.000043000  | -0.012153000 | H                                                          | -4.591125000 | -3.519860000 | -1.940265000 |
| C                                    | 3.673103000  | 4.410588000  | -0.119199000 | H                                                          | -4.872682000 | -1.785786000 | -1.771557000 |
| C                                    | 5.461890000  | 1.736273000  | -0.193310000 | H                                                          | -4.605595000 | 3.758536000  | 0.567638000  |
| C                                    | 5.465646000  | -1.729344000 | -0.189455000 | H                                                          | -4.895094000 | 2.044887000  | 0.747174000  |
| C                                    | 3.683007000  | -4.402986000 | -0.145107000 | H                                                          | -1.303603000 | 5.436058000  | -0.567623000 |
| C                                    | -2.021206000 | -4.981137000 | 0.122315000  | H                                                          | -3.015569000 | 5.269957000  | -0.261393000 |
| C                                    | -1.829361000 | -5.564140000 | 1.536285000  | H                                                          | -1.930293000 | 6.655425000  | 1.516426000  |
| C                                    | -4.394104000 | -2.792736000 | 0.111241000  | H                                                          | -2.581413000 | 5.164215000  | 2.221858000  |
| C                                    | -5.032081000 | -2.756512000 | -1.291335000 | H                                                          | -0.847889000 | 5.311941000  | 1.926828000  |
| C                                    | -4.399418000 | 2.785622000  | 0.107396000  | H                                                          | -6.114712000 | 2.926292000  | -1.243172000 |
| C                                    | -2.029384000 | 4.977276000  | 0.115774000  | H                                                          | -4.873570000 | 1.776922000  | -1.775528000 |
| C                                    | -1.835450000 | 5.564215000  | 1.527811000  | H                                                          | -4.594753000 | 3.511438000  | -1.944804000 |
| C                                    | -5.035292000 | 2.747641000  | -1.296132000 |                                                            |              |              |              |

**Table S16.** Coordinates of the optimized structure for singlet  $2^+$  at the RB3LYP/6-31G(d,p) (for C, N, H) and SDD (for Ni) level of theory.

| SCF Done: E(RB3LYP) = -1592.30431795 |              |              |              | Sum of electronic and zero-point Energies = -1591.709142   |              |              |              |
|--------------------------------------|--------------|--------------|--------------|------------------------------------------------------------|--------------|--------------|--------------|
| symmetry c1                          |              |              |              | Sum of electronic and thermal Energies = -1591.673602      |              |              |              |
| Charge = 1, Multiplicity =1          |              |              |              | Sum of electronic and thermal Enthalpies = -1591.672658    |              |              |              |
| Number of Imaginary Frequencies = 0  |              |              |              | Sum of electronic and thermal Free Energies = -1591.774912 |              |              |              |
| Atom                                 | x            | y            | z            | Atom                                                       | x            | y            | z            |
| C                                    | 3.066135000  | 0.684585000  | -0.107969000 | H                                                          | 0.706221000  | 4.388553000  | -0.014311000 |
| C                                    | 3.991165000  | 1.816946000  | -0.144361000 | H                                                          | -3.993834000 | 0.000130000  | 0.125630000  |
| C                                    | 3.218433000  | 2.948603000  | -0.114056000 | H                                                          | 0.705952000  | -4.388584000 | -0.014014000 |
| C                                    | 1.801362000  | 2.519685000  | -0.058670000 | H                                                          | 4.717872000  | 4.495104000  | -0.173127000 |
| N                                    | 1.745964000  | 1.202523000  | -0.056319000 | H                                                          | 3.209608000  | 4.905952000  | -0.996938000 |
| C                                    | 0.614441000  | 3.309785000  | -0.011851000 | H                                                          | 3.278548000  | 4.906561000  | 0.765598000  |
| C                                    | -0.639692000 | 2.748982000  | 0.033905000  | H                                                          | 5.818713000  | 1.198304000  | -1.100523000 |
| C                                    | -1.915177000 | 3.488188000  | 0.075092000  | H                                                          | 5.935403000  | 2.723484000  | -0.222973000 |
| C                                    | -2.908955000 | 2.560118000  | 0.095131000  | H                                                          | 5.889481000  | 1.199643000  | 0.663754000  |
| C                                    | -2.256117000 | 1.232083000  | 0.070215000  | H                                                          | 5.935074000  | -2.723978000 | -0.225429000 |
| N                                    | -0.907852000 | 1.378533000  | 0.034455000  | H                                                          | 5.818451000  | -1.196488000 | -1.099006000 |
| C                                    | -2.912294000 | 0.000095000  | 0.089965000  | H                                                          | 5.889556000  | -1.202427000 | 0.665234000  |
| C                                    | -2.256233000 | -1.231945000 | 0.069986000  | H                                                          | 3.280261000  | -4.905899000 | 0.767758000  |
| C                                    | -2.909132000 | -2.559934000 | 0.094765000  | H                                                          | 3.206345000  | -4.907162000 | -0.994547000 |
| C                                    | -1.915397000 | -3.488059000 | 0.074758000  | H                                                          | 4.717095000  | -4.495910000 | -0.175474000 |
| C                                    | -0.639918000 | -2.748928000 | 0.033736000  | H                                                          | -3.016467000 | -5.283390000 | -0.236082000 |
| N                                    | -0.907975000 | -1.378467000 | 0.034183000  | H                                                          | -1.309278000 | -5.427457000 | -0.580376000 |
| C                                    | 0.614237000  | -3.309806000 | -0.011634000 | H                                                          | -0.806674000 | -5.306028000 | 1.917521000  |
| C                                    | 1.801204000  | -2.519864000 | -0.058181000 | H                                                          | -2.539938000 | -5.191612000 | 2.237396000  |
| C                                    | 3.218179000  | -2.948913000 | -0.113727000 | H                                                          | -1.871544000 | -6.660715000 | 1.507926000  |
| C                                    | 3.990999000  | -1.817339000 | -0.144103000 | H                                                          | -4.860783000 | -2.074621000 | 0.807065000  |
| C                                    | 3.066035000  | -0.684888000 | -0.107627000 | H                                                          | -4.614586000 | -3.774628000 | 0.479573000  |
| N                                    | 1.745944000  | -1.202628000 | -0.055642000 | H                                                          | -6.120438000 | -2.750316000 | -1.231509000 |
| Ni                                   | 0.352852000  | -0.000024000 | -0.006977000 | H                                                          | -4.633354000 | -3.329400000 | -2.000646000 |
| C                                    | 3.633410000  | 4.383404000  | -0.130704000 | H                                                          | -4.855490000 | -1.603050000 | -1.700085000 |
| C                                    | 5.484109000  | 1.730216000  | -0.203945000 | H                                                          | -4.614314000 | 3.774774000  | 0.480432000  |
| C                                    | 5.483939000  | -1.730697000 | -0.203779000 | H                                                          | -4.860595000 | 2.074688000  | 0.807386000  |
| C                                    | 3.632800000  | -4.383813000 | -0.130115000 | H                                                          | -1.309248000 | 5.427472000  | -0.580491000 |
| C                                    | -2.026410000 | -4.985063000 | 0.121907000  | H                                                          | -3.016291000 | 5.283540000  | -0.235398000 |
| C                                    | -1.795694000 | -5.569870000 | 1.530542000  | H                                                          | -1.870529000 | 6.661020000  | 1.507891000  |
| C                                    | -4.394668000 | -2.772206000 | 0.100188000  | H                                                          | -2.538776000 | 5.192085000  | 2.237822000  |
| C                                    | -5.038576000 | -2.601624000 | -1.291578000 | H                                                          | -0.805622000 | 5.306311000  | 1.917303000  |
| C                                    | -4.394482000 | 2.772466000  | 0.100694000  | H                                                          | -6.120348000 | 2.751206000  | -1.230881000 |
| C                                    | -2.026089000 | 4.985196000  | 0.122171000  | H                                                          | -4.855679000 | 1.603872000  | -1.699856000 |
| C                                    | -1.794757000 | 5.570173000  | 1.530636000  | H                                                          | -4.633236000 | 3.330262000  | -1.999981000 |
| C                                    | -5.038512000 | 2.602368000  | -1.291065000 |                                                            |              |              |              |

**Table S17.** Coordinates of the optimized structure for broken-symmetry singlet  $2^+$  at the UB3LYP/6-31G(d,p) (for C, N, H) and SDD ( for Ni) level of theory.

| SCF Done: E(UB3LYP) = -1592.30463051 |              |              |              | Sum of electronic and zero-point Energies = -1591.711438   |              |              |              |
|--------------------------------------|--------------|--------------|--------------|------------------------------------------------------------|--------------|--------------|--------------|
| symmetry c1                          |              |              |              | Sum of electronic and thermal Energies = -1591.675668      |              |              |              |
| Charge = 1, Multiplicity =1          |              |              |              | Sum of electronic and thermal Enthalpies = -1591.674724    |              |              |              |
| Number of Imaginary Frequencies = 0  |              |              |              | Sum of electronic and thermal Free Energies = -1591.777797 |              |              |              |
| Atom                                 | x            | y            | z            | Atom                                                       | x            | y            | z            |
| C                                    | 3.058311000  | 0.693946000  | -0.107023000 | H                                                          | 0.707584000  | 4.388890000  | -0.016504000 |
| C                                    | 3.987295000  | 1.817416000  | -0.143911000 | H                                                          | -3.993055000 | 0.000159000  | 0.130020000  |
| C                                    | 3.216836000  | 2.955338000  | -0.114095000 | H                                                          | 0.707253000  | -4.388929000 | -0.016613000 |
| C                                    | 1.803880000  | 2.529612000  | -0.058793000 | H                                                          | 4.726121000  | 4.491968000  | -0.175282000 |
| N                                    | 1.750999000  | 1.203288000  | -0.055761000 | H                                                          | 3.220547000  | 4.913817000  | -0.996957000 |
| C                                    | 0.620356000  | 3.309323000  | -0.013258000 | H                                                          | 3.292186000  | 4.913733000  | 0.765796000  |
| C                                    | -0.643273000 | 2.747302000  | 0.032872000  | H                                                          | 5.815388000  | 1.195438000  | -1.099650000 |
| C                                    | -1.911698000 | 3.487329000  | 0.073800000  | H                                                          | 5.933407000  | 2.720152000  | -0.222840000 |
| C                                    | -2.909856000 | 2.557748000  | 0.096528000  | H                                                          | 5.885969000  | 1.197662000  | 0.664759000  |
| C                                    | -2.258810000 | 1.235140000  | 0.071632000  | H                                                          | 5.933110000  | -2.720559000 | -0.225516000 |
| N                                    | -0.908355000 | 1.381741000  | 0.034184000  | H                                                          | 5.815174000  | -1.193709000 | -1.098634000 |
| C                                    | -2.911066000 | 0.000118000  | 0.092642000  | H                                                          | 5.886060000  | -1.200206000 | 0.665752000  |
| C                                    | -2.258901000 | -1.234953000 | 0.071664000  | H                                                          | 3.292791000  | -4.913641000 | 0.766226000  |
| C                                    | -2.910049000 | -2.557510000 | 0.096586000  | H                                                          | 3.219211000  | -4.914356000 | -0.996446000 |
| C                                    | -1.911970000 | -3.487170000 | 0.073844000  | H                                                          | 4.725721000  | -4.492308000 | -0.176558000 |
| C                                    | -0.643480000 | -2.747240000 | 0.032855000  | H                                                          | -3.013980000 | -5.281292000 | -0.242274000 |
| N                                    | -0.908458000 | -1.381661000 | 0.034193000  | H                                                          | -1.306290000 | -5.428443000 | -0.579890000 |
| C                                    | 0.620096000  | -3.309358000 | -0.013346000 | H                                                          | -0.812220000 | -5.310319000 | 1.919165000  |
| C                                    | 1.803683000  | -2.529718000 | -0.058920000 | H                                                          | -2.545840000 | -5.189471000 | 2.233819000  |
| C                                    | 3.216600000  | -2.955562000 | -0.114279000 | H                                                          | -1.880813000 | -6.661066000 | 1.506248000  |
| C                                    | 3.987149000  | -1.817697000 | -0.144105000 | H                                                          | -4.865131000 | -2.075160000 | 0.804719000  |
| C                                    | 3.058275000  | -0.694157000 | -0.107114000 | H                                                          | -4.611064000 | -3.775864000 | 0.489708000  |
| N                                    | 1.750899000  | -1.203407000 | -0.055875000 | H                                                          | -6.120319000 | -2.774424000 | -1.229792000 |
| Ni                                   | 0.354137000  | -0.000003000 | -0.007123000 | H                                                          | -4.628474000 | -3.346452000 | -1.994915000 |
| C                                    | 3.640953000  | 4.387968000  | -0.131235000 | H                                                          | -4.863742000 | -1.620249000 | -1.703976000 |
| C                                    | 5.480623000  | 1.727533000  | -0.203314000 | H                                                          | -4.610781000 | 3.776311000  | 0.489380000  |
| C                                    | 5.480484000  | -1.727919000 | -0.203549000 | H                                                          | -4.864987000 | 2.075686000  | 0.804726000  |
| C                                    | 3.640607000  | -4.388221000 | -0.131384000 | H                                                          | -1.305734000 | 5.428561000  | -0.579804000 |
| C                                    | -2.024923000 | -4.984495000 | 0.119838000  | H                                                          | -3.013501000 | 5.281550000  | -0.242526000 |
| C                                    | -1.801065000 | -5.570487000 | 1.528973000  | H                                                          | -1.880544000 | 6.661201000  | 1.506245000  |
| C                                    | -4.395134000 | -2.775305000 | 0.103063000  | H                                                          | -2.545812000 | 5.189643000  | 2.233671000  |
| C                                    | -5.039544000 | -2.617952000 | -1.289948000 | H                                                          | -0.812127000 | 5.310359000  | 1.919311000  |
| C                                    | -4.394921000 | 2.775658000  | 0.102941000  | H                                                          | -6.120082000 | 2.774637000  | -1.229948000 |
| C                                    | -2.024540000 | 4.984665000  | 0.119777000  | H                                                          | -4.863568000 | 1.620295000  | -1.703895000 |
| C                                    | -1.800887000 | 5.570616000  | 1.528961000  | H                                                          | -4.628185000 | 3.346429000  | -1.995148000 |
| C                                    | -5.039316000 | 2.618084000  | -1.290056000 |                                                            |              |              |              |

**Table S18.** Coordinates of the optimized structure for triplet  $2^+$  at the UB3LYP/6-31G(d,p) (for C, N, H) and SDD (for Ni) level of theory.

| SCF Done: E(UB3LYP) = -1592.30104876 |              |              |              | Sum of electronic and zero-point Energies = -1591.706803   |              |              |              |
|--------------------------------------|--------------|--------------|--------------|------------------------------------------------------------|--------------|--------------|--------------|
| symmetry c1                          |              |              |              | Sum of electronic and thermal Energies = -1591.671747      |              |              |              |
| Charge = 1, Multiplicity = 3         |              |              |              | Sum of electronic and thermal Enthalpies = -1591.670802    |              |              |              |
| Number of Imaginary Frequencies = 0  |              |              |              | Sum of electronic and thermal Free Energies = -1591.773918 |              |              |              |
| Atom                                 | x            | y            | z            | Atom                                                       | x            | y            | z            |
| C                                    | 3.040123000  | 0.714174000  | -0.103978000 | H                                                          | 0.708879000  | 4.390506000  | -0.022789000 |
| C                                    | 3.978038000  | 1.821399000  | -0.139928000 | H                                                          | -3.990421000 | 0.000134000  | 0.136371000  |
| C                                    | 3.212487000  | 2.972101000  | -0.112609000 | H                                                          | 0.708588000  | -4.390550000 | -0.022865000 |
| C                                    | 1.810284000  | 2.554557000  | -0.060002000 | H                                                          | 4.744153000  | 4.486485000  | -0.171052000 |
| N                                    | 1.762908000  | 1.204976000  | -0.056378000 | H                                                          | 3.250609000  | 4.931300000  | -0.999057000 |
| C                                    | 0.633364000  | 3.309047000  | -0.017929000 | H                                                          | 3.316301000  | 4.933035000  | 0.764768000  |
| C                                    | -0.650761000 | 2.743411000  | 0.028756000  | H                                                          | 5.808228000  | 1.191221000  | -1.091500000 |
| C                                    | -1.905452000 | 3.485860000  | 0.070332000  | H                                                          | 5.929014000  | 2.714540000  | -0.215142000 |
| C                                    | -2.912418000 | 2.553596000  | 0.098465000  | H                                                          | 5.874996000  | 1.194084000  | 0.673100000  |
| C                                    | -2.264479000 | 1.243305000  | 0.072609000  | H                                                          | 5.928730000  | -2.714911000 | -0.218098000 |
| N                                    | -0.908820000 | 1.389917000  | 0.031274000  | H                                                          | 5.807938000  | -1.189389000 | -1.090631000 |
| C                                    | -2.907382000 | 0.000097000  | 0.095502000  | H                                                          | 5.875181000  | -1.196662000 | 0.673935000  |
| C                                    | -2.264560000 | -1.243153000 | 0.072655000  | H                                                          | 3.317040000  | -4.932932000 | 0.765085000  |
| C                                    | -2.912583000 | -2.553401000 | 0.098574000  | H                                                          | 3.249239000  | -4.931829000 | -0.998661000 |
| C                                    | -1.905678000 | -3.485731000 | 0.070433000  | H                                                          | 4.743797000  | -4.486799000 | -0.172579000 |
| C                                    | -0.650940000 | -2.743365000 | 0.028787000  | H                                                          | -3.008467000 | -5.277893000 | -0.256132000 |
| N                                    | -0.908912000 | -1.389854000 | 0.031290000  | H                                                          | -1.299055000 | -5.431611000 | -0.576344000 |
| C                                    | 0.633144000  | -3.309085000 | -0.017973000 | H                                                          | -0.826892000 | -5.316086000 | 1.925132000  |
| C                                    | 1.810113000  | -2.554673000 | -0.060085000 | H                                                          | -2.561644000 | -5.181489000 | 2.226340000  |
| C                                    | 3.212282000  | -2.972309000 | -0.112853000 | H                                                          | -1.902480000 | -6.659377000 | 1.506052000  |
| C                                    | 3.977909000  | -1.821658000 | -0.140173000 | H                                                          | -4.876002000 | -2.070316000 | 0.790389000  |
| C                                    | 3.040074000  | -0.714372000 | -0.104023000 | H                                                          | -4.604886000 | -3.774732000 | 0.519495000  |
| N                                    | 1.762829000  | -1.205089000 | -0.056369000 | H                                                          | -6.118277000 | -2.839164000 | -1.229171000 |
| Ni                                   | 0.358633000  | -0.000010000 | -0.009494000 | H                                                          | -4.615660000 | -3.404205000 | -1.978076000 |
| C                                    | 3.657264000  | 4.399857000  | -0.130538000 | H                                                          | -4.878466000 | -1.676049000 | -1.725590000 |
| C                                    | 5.471870000  | 1.723765000  | -0.196079000 | H                                                          | -4.604660000 | 3.775065000  | 0.519236000  |
| C                                    | 5.471743000  | -1.724116000 | -0.196472000 | H                                                          | -4.875890000 | 2.070686000  | 0.790251000  |
| C                                    | 3.656961000  | -4.400096000 | -0.130826000 | H                                                          | -1.298671000 | 5.431671000  | -0.576499000 |
| C                                    | -2.022264000 | -4.983511000 | 0.115861000  | H                                                          | -3.008106000 | 5.278083000  | -0.256353000 |
| C                                    | -1.814764000 | -5.569377000 | 1.527448000  | H                                                          | -1.902099000 | 6.659568000  | 1.505817000  |
| C                                    | -4.396738000 | -2.782475000 | 0.107625000  | H                                                          | -2.561402000 | 5.181760000  | 2.226141000  |
| C                                    | -5.039867000 | -2.667200000 | -1.289904000 | H                                                          | -0.826627000 | 5.316219000  | 1.925007000  |
| C                                    | -4.396559000 | 2.782763000  | 0.107449000  | H                                                          | -6.118050000 | 2.839455000  | -1.229410000 |
| C                                    | -2.021939000 | 4.983650000  | 0.115695000  | H                                                          | -4.878293000 | 1.676225000  | -1.725697000 |
| C                                    | -1.814462000 | 5.569563000  | 1.527265000  | H                                                          | -4.615373000 | 3.404346000  | -1.978308000 |
| C                                    | -5.039648000 | 2.667420000  | -1.290093000 |                                                            |              |              |              |



**Table S19.** Coordinates of the optimized structure for **3** at the UB3LYP/6-31G(d,p) (for C, N, F, H) and SDD ( for Ni) level of theory.

| SCF Done: E(UB3LYP) = -4450.62157920 |              |              |              | Sum of electronic and zero-point Energies = -4449.905149   |              |              |              |
|--------------------------------------|--------------|--------------|--------------|------------------------------------------------------------|--------------|--------------|--------------|
| symmetry c1                          |              |              |              | Sum of electronic and thermal Energies = -4449.841102      |              |              |              |
| Charge = 0, Multiplicity = 2         |              |              |              | Sum of electronic and thermal Enthalpies = -4449.840158    |              |              |              |
| Number of Imaginary Frequencies = 0  |              |              |              | Sum of electronic and thermal Free Energies = -4450.016244 |              |              |              |
| Atom                                 | x            | y            | z            | Atom                                                       | x            | y            | z            |
| C                                    | -0.690824000 | -3.618768000 | 0.042596000  | C                                                          | 2.913637000  | 3.649055000  | 0.764021000  |
| C                                    | -1.770218000 | -4.565859000 | 0.181021000  | C                                                          | 4.255855000  | 3.928954000  | 1.006631000  |
| C                                    | -2.971229000 | -3.798560000 | 0.199257000  | C                                                          | 5.217159000  | 2.915293000  | 0.947367000  |
| C                                    | -2.571707000 | -2.390236000 | 0.066935000  | C                                                          | 4.848409000  | 1.603776000  | 0.660784000  |
| N                                    | -1.226931000 | -2.340031000 | 0.011608000  | C                                                          | -0.913741000 | 6.710605000  | 2.336935000  |
| C                                    | -3.353872000 | -1.215366000 | -0.042171000 | F                                                          | -2.239166000 | 6.957660000  | 2.240044000  |
| C                                    | -2.780228000 | 0.052991000  | -0.165809000 | F                                                          | -0.720600000 | 6.016912000  | 3.477938000  |
| C                                    | -3.498729000 | 1.307239000  | -0.418170000 | F                                                          | -0.297821000 | 7.904710000  | 2.472223000  |
| C                                    | -2.530215000 | 2.335197000  | -0.453724000 | C                                                          | 0.913697000  | 6.710678000  | -2.336670000 |
| C                                    | -1.233410000 | 1.696556000  | -0.180669000 | F                                                          | 2.239178000  | 6.957483000  | -2.239935000 |
| N                                    | -1.416056000 | 0.340015000  | -0.074283000 | F                                                          | 0.297969000  | 7.904901000  | -2.471784000 |
| C                                    | 0.000021000  | 2.350464000  | 0.000065000  | F                                                          | 0.720285000  | 6.017110000  | -3.477706000 |
| C                                    | 1.233451000  | 1.696576000  | 0.180797000  | C                                                          | 7.622666000  | -2.246254000 | 2.488879000  |
| C                                    | 2.530252000  | 2.335186000  | 0.453888000  | F                                                          | 7.925847000  | -1.122488000 | 3.176935000  |
| C                                    | 3.498759000  | 1.307221000  | 0.418310000  | F                                                          | 6.868114000  | -3.015750000 | 3.301118000  |
| C                                    | 2.780254000  | 0.052998000  | 0.165864000  | F                                                          | 8.782270000  | -2.899522000 | 2.263912000  |
| N                                    | 1.416092000  | 0.340029000  | 0.074335000  | C                                                          | 7.730174000  | -1.166682000 | -2.420482000 |
| C                                    | 3.353900000  | -1.215351000 | 0.042101000  | F                                                          | 8.914166000  | -1.814548000 | -2.417590000 |
| C                                    | 2.571722000  | -2.390227000 | -0.066842000 | F                                                          | 7.993892000  | 0.146555000  | -2.601422000 |
| C                                    | 2.971231000  | -3.798553000 | -0.199212000 | F                                                          | 7.036527000  | -1.582457000 | -3.501385000 |
| C                                    | 1.770236000  | -4.565868000 | -0.180623000 | C                                                          | -7.622462000 | -2.245683000 | -2.489469000 |
| C                                    | 0.690859000  | -3.618775000 | -0.042022000 | F                                                          | -6.868053000 | -3.015501000 | -3.301543000 |
| N                                    | 1.226963000  | -2.340042000 | -0.011194000 | F                                                          | -7.925002000 | -1.121791000 | -3.177597000 |
| Ni                                   | 0.000001000  | -0.929211000 | 0.000113000  | F                                                          | -8.782387000 | -2.898460000 | -2.264758000 |
| C                                    | 0.000011000  | 3.847763000  | 0.000091000  | C                                                          | -7.730374000 | -1.167320000 | 2.420117000  |
| C                                    | -4.840751000 | -1.378399000 | -0.043058000 | F                                                          | -7.036222000 | -1.581754000 | 3.501197000  |
| C                                    | 4.840783000  | -1.378369000 | 0.042838000  | F                                                          | -8.913619000 | -1.816574000 | 2.417565000  |
| C                                    | 0.409752000  | 4.560942000  | -1.133613000 | F                                                          | -7.995663000 | 0.145692000  | 2.600414000  |
| C                                    | 0.408769000  | 5.957288000  | -1.132337000 | H                                                          | 0.724942000  | 4.022319000  | -2.020507000 |
| C                                    | -0.000024000 | 6.663273000  | 0.000137000  | H                                                          | -0.000042000 | 7.746986000  | 0.000155000  |
| C                                    | -0.408794000 | 5.957236000  | 1.132597000  | H                                                          | -0.724925000 | 4.022236000  | 2.020700000  |
| C                                    | -0.409740000 | 4.560899000  | 1.133829000  | H                                                          | -5.060660000 | -0.947971000 | 2.055366000  |
| C                                    | -5.574947000 | -1.212776000 | 1.137689000  | H                                                          | -8.704133000 | -1.908782000 | -0.014471000 |
| C                                    | -6.959505000 | -1.399384000 | 1.145174000  | H                                                          | -4.963183000 | -1.885133000 | -2.133329000 |
| C                                    | -7.632264000 | -1.752524000 | -0.024652000 | H                                                          | 4.963322000  | -1.885653000 | 2.132979000  |
| C                                    | -6.904641000 | -1.921095000 | -1.203957000 | H                                                          | 8.704169000  | -1.908714000 | 0.013930000  |

|   |              |              |              |   |              |              |              |
|---|--------------|--------------|--------------|---|--------------|--------------|--------------|
| C | -5.520293000 | -1.739522000 | -1.214127000 | H | 5.060586000  | -0.947373000 | -2.055467000 |
| C | 5.520392000  | -1.739800000 | 1.213794000  | H | 5.133086000  | -3.892434000 | -0.395652000 |
| C | 6.904724000  | -1.921362000 | 1.203513000  | H | 5.182753000  | -6.335658000 | -0.626124000 |
| C | 7.632301000  | -1.752477000 | 0.024205000  | H | 3.088512000  | -7.658870000 | -0.613785000 |
| C | 6.959494000  | -1.399027000 | -1.145478000 | H | 0.900474000  | -6.542340000 | -0.371419000 |
| C | 5.574919000  | -1.212422000 | -1.137882000 | H | -0.900455000 | -6.542280000 | 0.372333000  |
| C | 4.204287000  | -4.444681000 | -0.361690000 | H | -3.088529000 | -7.658828000 | 0.614318000  |
| C | 4.229728000  | -5.831178000 | -0.498993000 | H | -5.182803000 | -6.335660000 | 0.625934000  |
| C | 3.044356000  | -6.580984000 | -0.489784000 | H | -5.133135000 | -3.892473000 | 0.395140000  |
| C | 1.810442000  | -5.956320000 | -0.337053000 | H | -5.611105000 | 0.841217000  | -0.644204000 |
| C | -1.810429000 | -5.956287000 | 0.337654000  | H | -6.261053000 | 3.145683000  | -1.137451000 |
| C | -3.044367000 | -6.580959000 | 0.490171000  | H | -4.552517000 | 4.945011000  | -1.248388000 |
| C | -4.229757000 | -5.831177000 | 0.498976000  | H | -2.196238000 | 4.450995000  | -0.838354000 |
| C | -4.204311000 | -4.444695000 | 0.361509000  | H | 2.196260000  | 4.450961000  | 0.838622000  |
| C | -4.848403000 | 1.603835000  | -0.660445000 | H | 4.552502000  | 4.944895000  | 1.249037000  |
| C | -5.217173000 | 2.915392000  | -0.946837000 | H | 6.261016000  | 3.145549000  | 1.138149000  |
| C | -4.255862000 | 3.929040000  | -1.006123000 | H | 5.611106000  | 0.841151000  | 0.644509000  |
| C | -2.913617000 | 3.649096000  | -0.763698000 |   |              |              |              |

**Table S20.** Coordinates of the optimized structure for single  $3^+$  at the RB3LYP/6-31G(d,p) (for C, N, F, H) and SDD ( for Ni) level of theory.

|                                      |              |              |              |                                              |              |              |              |              |
|--------------------------------------|--------------|--------------|--------------|----------------------------------------------|--------------|--------------|--------------|--------------|
| SCF Done: E(UB3LYP) = -4450.41074818 |              |              |              | Sum of electronic and zero-point Energies=   |              |              |              | -4449.692746 |
| symmetry c1                          |              |              |              | Sum of electronic and thermal Energies=      |              |              |              | -4449.628725 |
| Charge = 1, Multiplicity = 1         |              |              |              | Sum of electronic and thermal Enthalpies=    |              |              |              | -4449.627781 |
| Number of Imaginary Frequencies = 0  |              |              |              | Sum of electronic and thermal Free Energies= |              |              |              | -4449.803643 |
| Atom                                 | x            | y            | z            | Atom                                         | x            | y            | z            |              |
| C                                    | 0.680209000  | -3.627509000 | -0.049680000 | C                                            | -2.915778000 | 3.655239000  | -0.716493000 |              |
| C                                    | 1.770274000  | -4.571909000 | -0.180826000 | C                                            | -4.265988000 | 3.938473000  | -0.940500000 |              |
| C                                    | 2.962275000  | -3.798916000 | -0.197897000 | C                                            | -5.224971000 | 2.929411000  | -0.875852000 |              |
| C                                    | 2.550406000  | -2.383755000 | -0.073742000 | C                                            | -4.853584000 | 1.610237000  | -0.602684000 |              |
| N                                    | 1.224061000  | -2.326256000 | -0.027258000 | C                                            | 0.846361000  | 6.713909000  | -2.368236000 |              |
| C                                    | 3.352044000  | -1.201641000 | 0.032171000  | F                                            | 2.176385000  | 6.936955000  | -2.312324000 |              |
| C                                    | 2.781092000  | 0.054773000  | 0.150498000  | F                                            | 0.602242000  | 6.017355000  | -3.497068000 |              |
| C                                    | 3.504357000  | 1.317409000  | 0.383550000  | F                                            | 0.239777000  | 7.910776000  | -2.476932000 |              |
| C                                    | 2.537086000  | 2.341179000  | 0.424020000  | C                                            | -0.846302000 | 6.714186000  | 2.367890000  |              |
| C                                    | 1.231327000  | 1.695889000  | 0.168711000  | F                                            | -2.176324000 | 6.937226000  | 2.311947000  |              |
| N                                    | 1.406949000  | 0.344487000  | 0.071083000  | F                                            | -0.239717000 | 7.911066000  | 2.476455000  |              |
| C                                    | 0.000008000  | 2.358332000  | 0.000075000  | F                                            | -0.602186000 | 6.017757000  | 3.496801000  |              |
| C                                    | -1.231321000 | 1.695894000  | -0.168503000 | C                                            | -7.607622000 | -2.198075000 | -2.512549000 |              |
| C                                    | -2.537073000 | 2.341176000  | -0.423853000 | F                                            | -7.885914000 | -1.058217000 | -3.179268000 |              |
| C                                    | -3.504363000 | 1.317429000  | -0.383251000 | F                                            | -6.846771000 | -2.961352000 | -3.324426000 |              |
| C                                    | -2.781104000 | 0.054793000  | -0.150172000 | F                                            | -8.770600000 | -2.842125000 | -2.303996000 |              |

|    |              |              |              |   |              |              |              |
|----|--------------|--------------|--------------|---|--------------|--------------|--------------|
| N  | -1.406971000 | 0.344507000  | -0.070675000 | C | -7.725550000 | -1.236705000 | 2.432428000  |
| C  | -3.352062000 | -1.201628000 | -0.031937000 | F | -8.902387000 | -1.888701000 | 2.412034000  |
| C  | -2.550427000 | -2.383755000 | 0.073813000  | F | -7.986081000 | 0.071333000  | 2.637260000  |
| C  | -2.962299000 | -3.798932000 | 0.197790000  | F | -7.022107000 | -1.675847000 | 3.496846000  |
| C  | -1.770301000 | -4.571929000 | 0.180594000  | C | 7.607711000  | -2.198103000 | 2.512581000  |
| C  | -0.680235000 | -3.627512000 | 0.049573000  | F | 6.846920000  | -2.961442000 | 3.324451000  |
| N  | -1.224080000 | -2.326252000 | 0.027332000  | F | 7.885955000  | -1.058244000 | 3.179332000  |
| Ni | 0.000000000  | -0.921099000 | 0.000140000  | F | 8.770718000  | -2.842079000 | 2.303982000  |
| C  | 0.000026000  | 3.856753000  | -0.000005000 | C | 7.725433000  | -1.236722000 | -2.432395000 |
| C  | 4.838494000  | -1.375280000 | 0.038310000  | F | 7.021892000  | -1.675715000 | -3.496810000 |
| C  | -4.838512000 | -1.375261000 | -0.038152000 | F | 8.902198000  | -1.888861000 | -2.412097000 |
| C  | -0.375555000 | 4.566516000  | 1.147287000  | F | 7.986109000  | 0.071293000  | -2.637152000 |
| C  | -0.375311000 | 5.962759000  | 1.144855000  | H | -0.662457000 | 4.031095000  | 2.045938000  |
| C  | 0.000036000  | 6.667700000  | -0.000171000 | H | 0.000041000  | 7.751614000  | -0.000240000 |
| C  | 0.375375000  | 5.962620000  | -1.145113000 | H | 0.662492000  | 4.030845000  | -2.045973000 |
| C  | 0.375606000  | 4.566376000  | -1.147382000 | H | 5.061043000  | -0.996507000 | -2.074129000 |
| C  | 5.570089000  | -1.241930000 | -1.147949000 | H | 8.693748000  | -1.926910000 | 0.024823000  |
| C  | 6.953324000  | -1.436398000 | -1.148972000 | H | 4.956842000  | -1.829814000 | 2.145213000  |
| C  | 7.622422000  | -1.765033000 | 0.030483000  | H | -4.956761000 | -1.829787000 | -2.145061000 |
| C  | 6.894721000  | -1.900059000 | 1.214267000  | H | -8.693765000 | -1.926898000 | -0.024844000 |
| C  | 5.511444000  | -1.710765000 | 1.220356000  | H | -5.061162000 | -0.996473000 | 2.074276000  |
| C  | -5.511409000 | -1.710738000 | -1.220231000 | H | -5.123882000 | -3.869209000 | 0.382076000  |
| C  | -6.894683000 | -1.900037000 | -1.214205000 | H | -5.192083000 | -6.317142000 | 0.602328000  |
| C  | -7.622439000 | -1.765018000 | -0.030453000 | H | -3.111205000 | -7.653401000 | 0.591157000  |
| C  | -6.953399000 | -1.436378000 | 1.149031000  | H | -0.911745000 | -6.552974000 | 0.360897000  |
| C  | -5.570162000 | -1.241905000 | 1.148072000  | H | 0.911704000  | -6.552917000 | -0.361450000 |
| C  | -4.199766000 | -4.427891000 | 0.351191000  | H | 3.111168000  | -7.653341000 | -0.591716000 |
| C  | -4.235052000 | -5.819950000 | 0.482428000  | H | 5.192060000  | -6.317091000 | -0.602629000 |
| C  | -3.059464000 | -6.575733000 | 0.474207000  | H | 5.123864000  | -3.869186000 | -0.382130000 |
| C  | -1.815294000 | -5.957939000 | 0.328655000  | H | 5.616711000  | 0.848884000  | 0.578341000  |
| C  | 1.815259000  | -5.957899000 | -0.329069000 | H | 6.270742000  | 3.162022000  | 1.049242000  |
| C  | 3.059431000  | -6.575685000 | -0.474648000 | H | 4.563674000  | 4.956594000  | 1.169715000  |
| C  | 4.235024000  | -5.819909000 | -0.482726000 | H | 2.199221000  | 4.457083000  | 0.790933000  |
| C  | 4.199742000  | -4.427863000 | -0.351334000 | H | -2.199179000 | 4.457040000  | -0.790974000 |
| C  | 4.853567000  | 1.610197000  | 0.603071000  | H | -4.563649000 | 4.956581000  | -1.169618000 |
| C  | 5.224966000  | 2.929384000  | 0.876166000  | H | -6.270758000 | 3.162067000  | -1.048838000 |
| C  | 4.266006000  | 3.938477000  | 0.940648000  | H | -5.616752000 | 0.848952000  | -0.577803000 |
| C  | 2.915804000  | 3.655258000  | 0.716566000  |   |              |              |              |

**Table S21.** Coordinates of the optimized structure for triplet  $3^+$  at the UB3LYP/6-31G(d,p) (for C, N, F, H) and SDD ( for Ni) level.

| SCF Done: E(UB3LYP) = -4450.39870845 |              |              |              | Sum of electronic and zero-point Energies= -4449.681604   |              |              |              |
|--------------------------------------|--------------|--------------|--------------|-----------------------------------------------------------|--------------|--------------|--------------|
| symmetry c1                          |              |              |              | Sum of electronic and thermal Energies= -4449.617489      |              |              |              |
| Charge = 1, Multiplicity = 3         |              |              |              | Sum of electronic and thermal Enthalpies= -4449.616545    |              |              |              |
| Number of Imaginary Frequencies = 0  |              |              |              | Sum of electronic and thermal Free Energies= -4449.793481 |              |              |              |
| Atom                                 | x            | y            | z            | Atom                                                      | x            | y            | z            |
| C                                    | 0.709108000  | -3.610242000 | -0.045745000 | C                                                         | -2.886423000 | 3.624534000  | -0.891962000 |
| C                                    | 1.774341000  | -4.566981000 | -0.214771000 | C                                                         | -4.222760000 | 3.890760000  | -1.184523000 |
| C                                    | 2.980206000  | -3.807400000 | -0.226463000 | C                                                         | -5.183198000 | 2.875080000  | -1.138584000 |
| C                                    | 2.588744000  | -2.399891000 | -0.060424000 | C                                                         | -4.823925000 | 1.569611000  | -0.813154000 |
| N                                    | 1.225978000  | -2.353716000 | 0.006170000  | C                                                         | 1.025096000  | 6.691205000  | -2.296471000 |
| C                                    | 3.352744000  | -1.237686000 | 0.067511000  | F                                                         | 2.346485000  | 6.915071000  | -2.138265000 |
| C                                    | 2.764961000  | 0.047996000  | 0.219111000  | F                                                         | 0.868805000  | 5.994452000  | -3.440562000 |
| C                                    | 3.481061000  | 1.286703000  | 0.519549000  | F                                                         | 0.427480000  | 7.887384000  | -2.450950000 |
| C                                    | 2.512778000  | 2.318590000  | 0.545559000  | C                                                         | -1.025653000 | 6.691302000  | 2.296006000  |
| C                                    | 1.229572000  | 1.687471000  | 0.222595000  | F                                                         | -2.347014000 | 6.915225000  | 2.137670000  |
| N                                    | 1.416750000  | 0.329319000  | 0.097119000  | F                                                         | -0.427998000 | 7.887461000  | 2.450510000  |
| C                                    | -0.000090000 | 2.338542000  | -0.000070000 | F                                                         | -0.869498000 | 5.994570000  | 3.440129000  |
| C                                    | -1.229707000 | 1.687383000  | -0.222720000 | C                                                         | -7.641256000 | -2.327488000 | -2.446696000 |
| C                                    | -2.512949000 | 2.318395000  | -0.545746000 | F                                                         | -7.930991000 | -1.229980000 | -3.176256000 |
| C                                    | -3.481156000 | 1.286431000  | -0.519741000 | F                                                         | -6.889513000 | -3.137167000 | -3.221107000 |
| C                                    | -2.764977000 | 0.047796000  | -0.219199000 | F                                                         | -8.800018000 | -2.959355000 | -2.184314000 |
| N                                    | -1.416801000 | 0.329230000  | -0.097125000 | C                                                         | -7.706963000 | -1.015094000 | 2.417587000  |
| C                                    | -3.352659000 | -1.237953000 | -0.067619000 | F                                                         | -8.896901000 | -1.642164000 | 2.447302000  |
| C                                    | -2.588549000 | -2.400118000 | 0.059917000  | F                                                         | -7.938841000 | 0.308836000  | 2.535221000  |
| C                                    | -2.979849000 | -3.807667000 | 0.225990000  | F                                                         | -7.005253000 | -1.396530000 | 3.505064000  |
| C                                    | -1.773932000 | -4.567157000 | 0.213901000  | C                                                         | 7.640904000  | -2.326540000 | 2.447734000  |
| C                                    | -0.708812000 | -3.610304000 | 0.044732000  | F                                                         | 6.888910000  | -3.135715000 | 3.222420000  |
| N                                    | -1.225792000 | -2.353830000 | -0.007018000 | F                                                         | 7.930832000  | -1.228785000 | 3.176858000  |
| Ni                                   | 0.000042000  | -0.938824000 | -0.000198000 | F                                                         | 8.799548000  | -2.958777000 | 2.185723000  |
| C                                    | -0.000137000 | 3.836053000  | -0.000110000 | C                                                         | 7.707486000  | -1.015487000 | -2.416918000 |
| C                                    | 4.841578000  | -1.382829000 | 0.052721000  | F                                                         | 7.006340000  | -1.398193000 | -3.504320000 |
| C                                    | -4.841477000 | -1.383153000 | -0.052481000 | F                                                         | 8.897861000  | -1.641753000 | -2.445856000 |
| C                                    | -0.465131000 | 4.543435000  | 1.115052000  | F                                                         | 7.938458000  | 0.308518000  | -2.535445000 |
| C                                    | -0.462415000 | 5.939479000  | 1.112644000  | H                                                         | -0.822918000 | 4.008419000  | 1.988090000  |
| C                                    | -0.000269000 | 6.644037000  | -0.000225000 | H                                                         | -0.000319000 | 7.727936000  | -0.000273000 |
| C                                    | 0.461936000  | 5.939434000  | -1.113038000 | H                                                         | 0.822599000  | 4.008328000  | -1.988334000 |
| C                                    | 0.464780000  | 4.543387000  | -1.115334000 | H                                                         | 5.042414000  | -0.846928000 | -2.028152000 |
| C                                    | 5.561480000  | -1.148714000 | -1.124509000 | H                                                         | 8.704129000  | -1.857475000 | -0.018973000 |
| C                                    | 6.947889000  | -1.317590000 | -1.145892000 | H                                                         | 4.978873000  | -1.988676000 | 2.120370000  |
| C                                    | 7.630004000  | -1.716840000 | 0.003650000  | H                                                         | -4.979185000 | -1.989544000 | -2.119935000 |
| C                                    | 6.912464000  | -1.950905000 | 1.178378000  | H                                                         | -8.704016000 | -1.857740000 | 0.020108000  |

|   |              |              |              |   |              |              |              |
|---|--------------|--------------|--------------|---|--------------|--------------|--------------|
| C | 5.526036000  | -1.791248000 | 1.204744000  | H | -5.041894000 | -0.846693000 | 2.028296000  |
| C | -5.526166000 | -1.791869000 | -1.204253000 | H | -5.137165000 | -3.910013000 | 0.443534000  |
| C | -6.912598000 | -1.951501000 | -1.177568000 | H | -5.158537000 | -6.350698000 | 0.737827000  |
| C | -7.629894000 | -1.717117000 | -0.002765000 | H | -3.058626000 | -7.656353000 | 0.740498000  |
| C | -6.947539000 | -1.317577000 | 1.146547000  | H | -0.878422000 | -6.529239000 | 0.449722000  |
| C | -5.561144000 | -1.148721000 | 1.124841000  | H | 0.879031000  | -6.529097000 | -0.451062000 |
| C | -4.204013000 | -4.454988000 | 0.415274000  | H | 3.059411000  | -7.656056000 | -0.741164000 |
| C | -4.211848000 | -5.841618000 | 0.588061000  | H | 5.159235000  | -6.350254000 | -0.737718000 |
| C | -3.023051000 | -6.582713000 | 0.587378000  | H | 5.137596000  | -3.909588000 | -0.443367000 |
| C | -1.793639000 | -5.952416000 | 0.406780000  | H | 5.583859000  | 0.804852000  | 0.807791000  |
| C | 1.794200000  | -5.952222000 | -0.407765000 | H | 6.219106000  | 3.100494000  | 1.369726000  |
| C | 3.023715000  | -6.582426000 | -0.588002000 | H | 4.515711000  | 4.899930000  | 1.456424000  |
| C | 4.212459000  | -5.841250000 | -0.588245000 | H | 2.168374000  | 4.427205000  | 0.957096000  |
| C | 4.204472000  | -4.454625000 | -0.415397000 | H | -2.168692000 | 4.427019000  | -0.957377000 |
| C | 4.823838000  | 1.570016000  | 0.812783000  | H | -4.516028000 | 4.899528000  | -1.456879000 |
| C | 5.183029000  | 2.875531000  | 1.138122000  | H | -6.219271000 | 3.099947000  | -1.370299000 |
| C | 4.222508000  | 3.891129000  | 1.184121000  | H | -5.583875000 | 0.804378000  | -0.808220000 |
| C | 2.886169000  | 3.624779000  | 0.891675000  |   |              |              |              |

## 10. References

- (a) Xu, T.; Han, Y.; Shen, Z.; Hou, X.; Jiang, Q.; Zeng, W.; Ng, P. W.; Chi, C., Antiaromatic Dicyclopenta[b,g]/[a,f]naphthalene Isomers Showing an Open-Shell Singlet Ground State with Tunable Diradical Character. *J. Am. Chem. Soc.* **2021**, *143*, 20562-20568; (b) Bleaney, B.; Bowers, K. D., Anomalous paramagnetism of copper acetate. *Proc. R. Soc. A* **1952**, *214*, 451-465.
- (a) Yamaguchi, K., The electronic structures of biradicals in the unrestricted Hartree-Fock approximation. *Chem. Phys. Lett.* **1975**, *33*, 330-335; (b) Guo, J.; Yang, Y.; Dou, C.; Wang, Y., Boron-Containing Organic Diradicaloids: Dynamically Modulating Singlet Diradical Character by Lewis Acid-Base Coordination. *J. Am. Chem. Soc.* **2021**, *143*, 18272-18279.
- (a) Yamaguchi, K.; Jensen, F.; Dorigo, A.; Houk, K. N., A spin correction procedure for unrestricted Hartree-Fock and Møller-Plesset wavefunctions for singlet diradicals and polyradicals. *Chem. Phys. Lett.* **1988**, *149*, 537-542; (b) Yoshida, T.; Takahashi, K.; Ide, Y.; Kishi, R.; Fujiyoshi, J.-y.; Lee, S.; Hiraoka, Y.; Kim, D.; Nakano, M.; Ikeue, T.; Yamada, H.; Shinokubo, H., Benzonorcorrole NiII Complexes: Enhancement of Paratropic Ring Current and Singlet Diradical Character by Benzo-Fusion. *Angew. Chem. Int. Ed.* **2018**, *57*, 2209-2213.
